# 1 **Dinosaur bonebed amber from an original swamp forest soil**

2

3 Sergio Álvarez-Parra<sup>1\*</sup>, Ricardo Pérez-de la Fuente<sup>2</sup>, Enrique Peñalver<sup>3</sup>, Eduardo  
4 Barrón<sup>3</sup>, Luis Alcalá<sup>4</sup>, Jordi Pérez-Cano<sup>1</sup>, Carles Martín-Closas<sup>1</sup>, Khaled Trabelsi<sup>5,6,7</sup>,  
5 Nieves Meléndez<sup>8</sup>, Rafael López Del Valle<sup>9</sup>, Rafael P Lozano<sup>3</sup>, David Peris<sup>1</sup>, Ana  
6 Rodrigo<sup>3</sup>, Víctor Sarto i Monteys<sup>10</sup>, Carlos A Bueno-Cebollada<sup>3</sup>, César Menor-  
7 Salván<sup>11,12</sup>, Marc Philippe<sup>13</sup>, Alba Sánchez-García<sup>14,15</sup>, Constanza Peña-Kairath<sup>1</sup>,  
8 Antonio Arillo<sup>16</sup>, Eduardo Espílez<sup>4</sup>, Luis Mampel<sup>4</sup>, Xavier Delclòs<sup>1</sup>

9

10 <sup>1</sup>Departament de Dinàmica de la Terra i de l'Oceà and Institut de Recerca de la  
11 Biodiversitat (IRBio), Facultat de Ciències de la Terra, Universitat de Barcelona, c/  
12 Martí i Franquès s/n, 08028, Barcelona, Spain.

13 <sup>2</sup>Oxford University Museum of Natural History, Parks Road, Oxford, OX1 3PW, UK.

14 <sup>3</sup>Museo Geominero (IGME, CSIC), c/ Ríos Rosas 23, 28003, Madrid, Spain.

15 <sup>4</sup>Fundación Conjunto Paleontológico de Teruel-Dinópolis/Museo Aragonés de  
16 Paleontología, Av. Sagunto s/n, 44002, Teruel, Spain.

17 <sup>5</sup>Université de Sfax, Faculté des Sciences de Sfax, 3038, Sfax, Tunisie.

18 <sup>6</sup>Université de Tunis El Manar II, Faculté des Sciences de Tunis, LR18 ES07, 2092,  
19 Tunis, Tunisie.

20 <sup>7</sup>Department of Geology, University of Vienna, UZA 2, Althanstrasse 14, 1090,  
21 Vienna, Austria.

22 <sup>8</sup>Departamento de Geodinámica, Estratigrafía y Paleontología, Facultad de Ciencias  
23 Geológicas, Universidad Complutense de Madrid, Ciudad Universitaria, 28040,  
24 Madrid, Spain.

25 <sup>9</sup>Museo de Ciencias Naturales de Álava, c/ Siervas de Jesús 24, 01001, Vitoria-  
26 Gasteiz, Spain.

27 <sup>10</sup>Institut de Ciència i Tecnologia Ambientals (ICTA), Edifici Z – ICTA-ICP, Universitat  
28 Autònoma de Barcelona, 08193, Bellaterra, Barcelona, Spain.

29 <sup>11</sup>Departamento de Biología de Sistemas/Instituto de Investigación Química “Andrés  
30 del Río” (IQAR), Universidad de Alcalá, 28805, Alcalá de Henares, Madrid, Spain.

31 <sup>12</sup>School of Chemistry and Biochemistry, Georgia Institute of Technology, Atlanta, GA  
32 30332, USA.

33 <sup>13</sup>Univ. Lyon, Université Claude Bernard Lyon 1, CNRS, ENTPE, UMR 5023 LEHNA,  
34 F-69622, Villeurbanne, France.

35 <sup>14</sup>Departament de Botànica i Geologia, Facultat de Ciències Biològiques, Universitat  
36 de València, c/ Dr. Moliner 50, 46100, Burjassot, Valencia, Spain.

37 <sup>15</sup>Division of Invertebrate Zoology, American Museum of Natural History, Central  
38 Park West at 79<sup>th</sup> Street, New York, NY 10024-5192, USA.

39 <sup>16</sup>Departamento de Biodiversidad, Ecología y Evolución, Facultad de Biología,  
40 Universidad Complutense de Madrid, c/ José Antonio Novais 12, 28040, Madrid,  
41 Spain.

42

43 \*Correspondence: [sergio.alvarez-parra@ub.edu](mailto:sergio.alvarez-parra@ub.edu)

44

## 45 **Abstract**

46 Dinosaur bonebeds with amber content, yet scarce, offer a superior wealth and  
47 quality of data on ancient terrestrial ecosystems. However, the preserved  
48 palaeodiversity and/or taphonomic characteristics of these exceptional localities had  
49 hitherto limited their palaeobiological potential. Here we describe the amber from the

50 Lower Cretaceous dinosaur bonebed of Ariño (Teruel, Spain) using a  
51 multidisciplinary approach. Amber is found in both a root layer with amber strictly in  
52 situ and a litter layer namely composed of aerial pieces unusually rich in  
53 bioinclusions, encompassing 11 insect orders, arachnids, and a few plant and  
54 vertebrate remains, including a feather. Additional palaeontological data –  
55 charophytes, palynomorphs, ostracods– are provided. Ariño arguably represents the  
56 most prolific and palaeobiologically diverse locality in which fossiliferous amber and a  
57 dinosaur bonebed have been found in association, and the only one known where  
58 the vast majority of the palaeontological assemblage suffered no or low-grade pre-  
59 burial transport. That has enabled unlocking unprecedentedly complete and reliable  
60 palaeoecological data out of two complementary windows of preservation from the  
61 same site.

62

## 63 **Introduction**

64 Localities preserving either vertebrate bonebeds or fossilised plant resin (amber) are  
65 among the most valuable sources of information on past terrestrial ecosystems  
66 (**Rogers et al., 2007; Seyfullah et al., 2018**). Yet, when a bonebed and fossilised  
67 resin are found jointly in the same site, and there is certainty that they originally  
68 belonged to the same biocoenosis, the potential for extracting and integrating  
69 palaeobiological data is barely unmatched in palaeontology. Although amber from the  
70 Cretaceous is often found together with other fossils such as plant and, more  
71 infrequently, vertebrate remains, fossiliferous amber associated with bonebeds  
72 including dinosaurs has been previously reported in only three occasions. Firstly, the  
73 lower Cenomanian (ca. 96–100.5 Ma) locality of Fouras/Bois Vert (Charente-  
74 Maritime, France) yielded diverse vertebrate remains –including about 50 dinosaur

75 bone fragments—, plant macroremains, molluscs, and amber lumps, a few of which  
76 were fossiliferous (**Néraudeau et al., 2003**). From the latter, ~110 bioinclusions  
77 belonging to arachnids, springtails and, at least, four insect orders have been  
78 reported, including several species described (**Perrichot et al., 2007; Tihelka et al.,**  
79 **2021**). Secondly, amber is known from the upper Campanian (~73 Ma) Pipestone  
80 Creek bonebed (Alberta, Canada) (**Tanke, 2004; Currie et al., 2008**). Although  
81 >99% of the 3,000 individual fossils recovered from this site belong to  
82 *Pachyrhinosaurus*, other dinosaurs, fish, turtles, lizards, and crocodylians were found  
83 (**Bell and Currie, 2006; Currie et al., 2008; Cockx et al., 2020**). Six bioinclusions  
84 recovered from ca. 50 cm<sup>3</sup> of typically <1 cm amber pieces were described (**Cockx**  
85 **et al., 2020**). Lastly, fossiliferous amber was found in the Stratum 11 from the  
86 uppermost Maastrichtian (ca. 67–66 Ma) Bone Butte bonebed site (South Dakota,  
87 USA) (**DePalma, 2010**). This site, belonging to the intensively-studied Hell Creek  
88 Formation (Fm.), provided ~3,000 mostly disarticulated fossils representing >50  
89 species of dinosaurs and other vertebrates; the non-vertebrate material included  
90 molluscs, ichnofossils, and plant macroremains, and was mostly found together with  
91 the fossiliferous amber (**DePalma, 2010; DePalma et al., 2015**). The palaeodiversity  
92 recovered from the latter, in contrast, was rather scarce, with 22 bioinclusions found  
93 in 400 g of collected amber (**DePalma, 2010; DePalma et al., 2010; Nel et al.,**  
94 **2010**). Other Bone Butte strata yielded non-fossiliferous amber (**DePalma, 2010**). In  
95 addition, a hadrosaur jaw with an amber piece originally attached to it and containing  
96 an inclusion was reported from the uppermost Campanian Dinosaur Park Fm. in  
97 Alberta (**McKellar et al., 2019**). Further Upper Cretaceous bonebed localities from  
98 western Canada yielded amber but lacking bioinclusions (**Cockx et al., 2021**).

99 The Ariño deposit represents one of the most important Lower Cretaceous  
100 dinosaur sites from Europe (**Alcalá et al., 2012**). This outcrop, located within the  
101 Santa María open-pit coal mine (Ariño municipality, Teruel Province, Spain), takes  
102 part in the Oliete Sub-basin from the Maestrazgo Basin (eastern Iberian Peninsula)  
103 (**Salas and Guimerà, 1996**). This extensional sub-basin was infilled with sediments  
104 deposited in palaeoenvironments ranging from marine to continental during the early  
105 Barremian to middle Albian (**Meléndez et al., 2000**). In this sub-basin, the siliciclastic  
106 Escucha Fm., early Albian in age (**Peyrot et al., 2007; Bover-Arnal et al., 2016**),  
107 was deposited overlying Aptian marine carbonates (**Cervera et al., 1976**). This  
108 formation represents coastal environments that included barrier-island systems with  
109 back-barrier marshes and flood-tidal deltas (**Rodríguez-López et al., 2009**). The AR-  
110 1 level of the Ariño locality, with ca. 600,000 m<sup>2</sup> of surveyed surface, consists of  
111 marls with a high concentration of organic matter occasionally forming coal which  
112 underlie the lowest level of coal exploited in the Santa María mine (**Figure 1,**  
113 **Supplementary Video 1**) (**Alcalá et al., 2012**). The AR-1 level has yielded a rich  
114 and diverse vertebrate fossil record representing more than 10,000 fossils namely  
115 found in more than 160 mono- or bitaxic concentrations of usually well-preserved,  
116 articulated or semi-articulated partial skeletons (**Alcalá et al., 2012, 2018;**  
117 **Buscalioni et al., 2013; Villanueva-Amadoz et al., 2015**). From these, new species  
118 of freshwater and terrestrial turtles, crocodylians, and ornithischian dinosaurs –i.e.,  
119 the ornithopod *Proa valdearinnensis* and the nodosaurid *Europelta carbonensis*–  
120 have been described (**McDonald et al., 2012; Buscalioni et al., 2013; Kirkland et**  
121 **al., 2013; Pérez-García et al., 2015, 2020**). Predatory dinosaurs were also present  
122 in the Ariño ecosystem, as evidenced by coprolites, ichnites, and isolated  
123 allosauroid teeth (**Alcalá et al., 2012, 2018; Vajda et al., 2016**). Chondrichthyan

124 and osteichthyan fish remains have also been occasionally found (*Alcalá et al.*,  
125 **2012**). Regarding the invertebrate record, three ostracod species (*Tibert et al.*,  
126 **2013**), as well as freshwater bivalves and gastropods, were reported (*Alcalá et al.*,  
127 **2012; Kirkland et al., 2013**). From the palaeobotanical standpoint, two charophyte  
128 species, fern remains, conifer twigs, taxonomically unassigned charcoalfied wood  
129 remains, undetermined cuticles, and palynomorphs found in both the marls and  
130 coprolites (spores, gymnosperm, and angiosperm pollen grains) were previously  
131 known (*Tibert et al., 2013; Villanueva-Amadoz et al., 2015; Vajda et al., 2016*).  
132 Based on the former geological and palaeontological data, the Ariño  
133 palaeoenvironment was inferred as a freshwater swamp plain with perennial alkaline  
134 shallow lakes subjected to salinity fluctuations due to marine influence under a  
135 tropical–subtropical climate (*Alcalá et al., 2012; Tibert et al., 2013; Villanueva-*  
136 *Amadoz et al., 2015*). The level AR-1 was dated as early Albian (ca. 110 Ma) based  
137 on charophyte, palynological, and ostracod assemblages (*Tibert et al., 2013;*  
138 *Villanueva-Amadoz et al., 2015; Vajda et al., 2016*).

139 The presence of indeterminate amounts of amber in the AR-1 level from Ariño  
140 was first noted by *Alcalá et al. (2012)*, with later works only adding that amber  
141 pieces were abundant and sometimes large (*Alcalá et al., 2018*). The only hitherto  
142 described bioinclusion from Ariño amber was a tuft of three remarkably well-  
143 preserved mammalian hair strands corresponding to the oldest hair reported in  
144 amber (*Álvarez-Parra et al., 2020a*).

145 In the Iberian Peninsula, amber is found in Triassic (Ladinian–Rhaetian) and  
146 Cretaceous (Albian–Maastrichtian) deposits; those having yielded abundant amber  
147 with bioinclusions are mostly late Albian in age, namely from the Basque-Cantabrian  
148 (e.g., Peñacerrada I and El Soplao) and Maestrazgo basins (e.g., San Just) (*Alonso*

149 ***et al., 2000; Delclòs et al., 2007; Peñalver et al., 2007; Najarro et al., 2009;***  
150 ***Peñalver and Delclòs, 2010***).

151 Here, we characterise the amber deposit associated with the dinosaur bonebed  
152 AR-1 of Ariño from a multidisciplinary standpoint, describing its morphological,  
153 geochemical, palaeofaunistic, and taphonomic features, all of which allow to  
154 recognise the palaeobiological singularity of the site. Together with complementary  
155 palaeontological data (charophytes, palynomorphs, ostracods), our results enable a  
156 complete palaeoecological reconstruction of this unique locality.

157

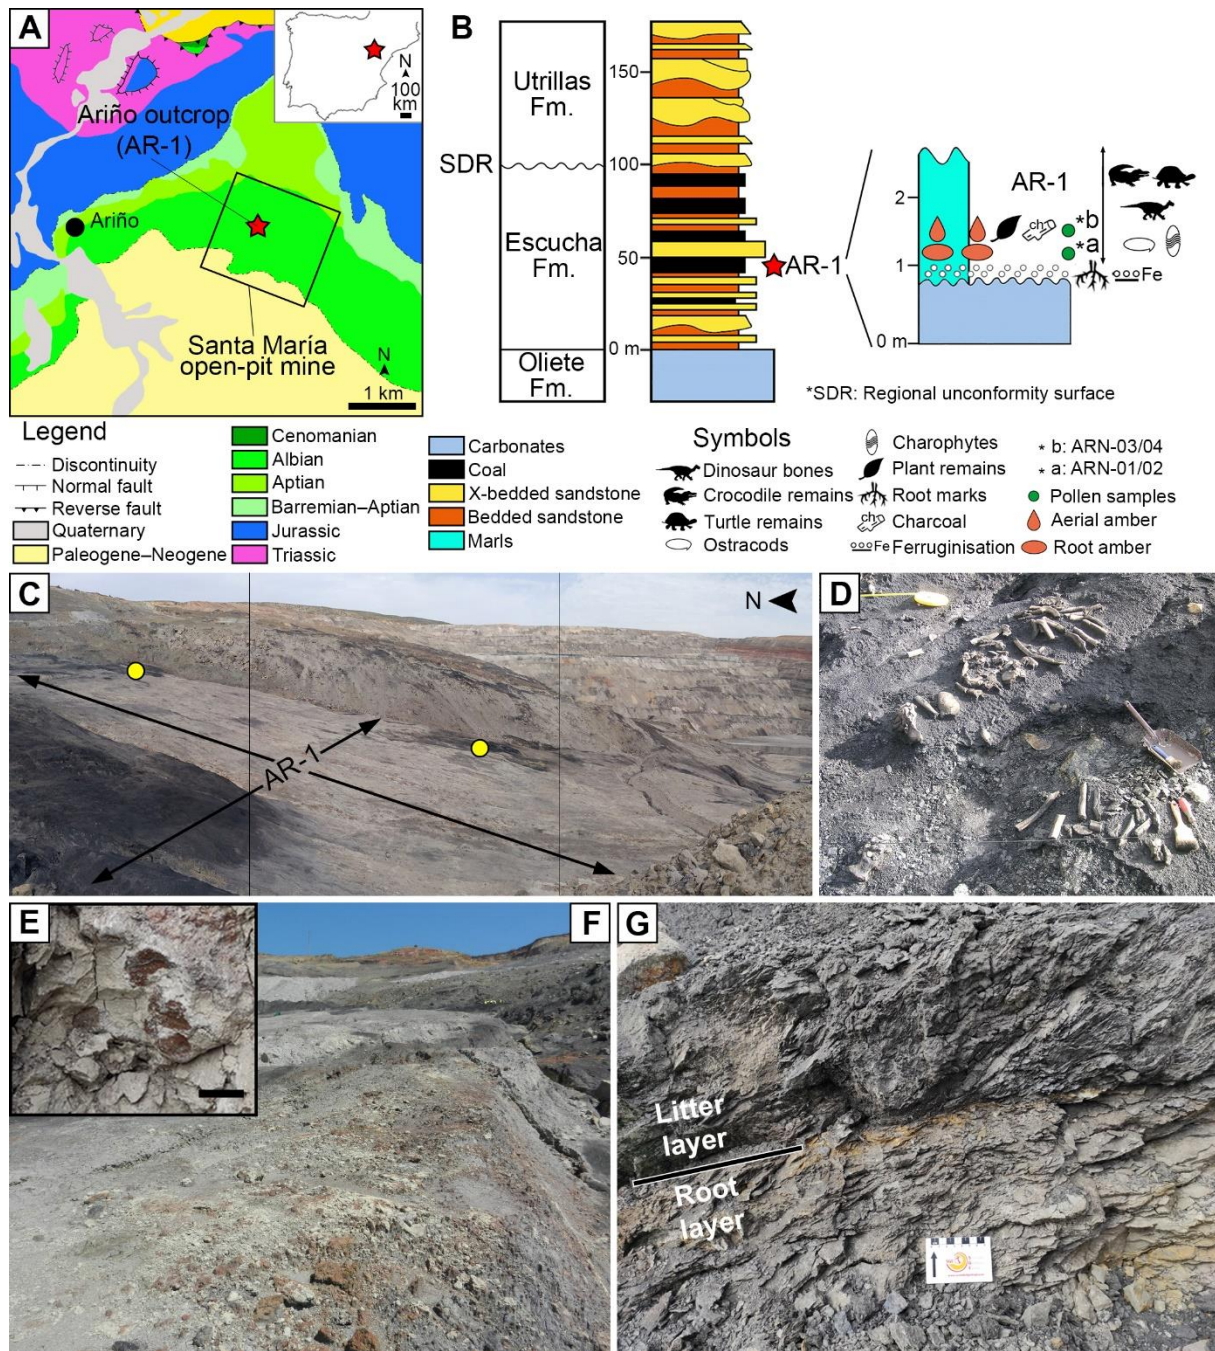

158

159 **Figure 1.** The Lower Cretaceous vertebrate bonebed and amber site of Ariño. (A)

160 Geographical and geological location; modified from *Alcalá et al. (2012)* (B)

161 Stratigraphic location of the level AR-1; general stratigraphic log from the Oliete Sub-

162 basin, modified from *Kirkland et al. (2013)*, is shown at the left, together with the

163 location of the level AR-1 (red star); a section of the latter, including the stratigraphic

164 location of the amber deposit studied herein, is shown at the right. (C) Santa María

165 open-pit coal mine with indication of the level AR-1 and the two excavated areas rich



166 in aerial amber (yellow dots); the bottom of the open-pit coal is at the right. **(D)** One  
167 of the 160+ bone concentrations found in Ariño, AR-1/10, during vertebrate fieldwork  
168 in 2010, showing the holotype of the nodosaurid *Europelta carbonensis*; metal  
169 dustpan ~30 cm long. **(E)** Root marks at the top of the carbonates below the level  
170 AR-1; scale bar, 1 cm. **(F)** Carbonates right below the level AR-1, displaying edaphic  
171 features at the top. **(G)** Detail photograph of the level AR-1 showing the lower root  
172 layer (with amber from resin exuded by roots) and the upper litter layer (with amber  
173 from resin exuded by trunk and branches); centimetric scale. See also  
174 ***Supplementary Video 1.***

175

## 176 **Results**

177

### 178 **Amber characteristics**

179 Two distinct amber-bearing layers, a lower one and an upper one, are present in the  
180 Ariño AR-1 level (***Figures 1, 2—figure supplements 1 and 2***). The lower layer  
181 overlies a level of carbonates of oligotrophic lacustrine origin showing the  
182 development of palaeosols at its top, including root marks (***Figure 1E,F***). This layer is  
183 characterised by abundant, irregular amber lumps (i.e., kidney-shaped) 10–40 cm in  
184 length with protrusions, an opaque crust, an inner banding pattern, and lacking  
185 bioinclusions (***Figure 2A,C,F—figure supplement 1***). Aerial amber and charcoalfied  
186 plant remains are absent in this layer. The kidney-shaped amber pieces are  
187 distributed along the exposed area of the AR-1 level and, if not partially exposed due  
188 to weathering, are complete. The opaque crust from the amber pieces has an  
189 irregular morphology and its ultrastructure shows delicate microprotrusions and no  
190 evidence of linear grooves (***Figure 2C–E***). The banding patterns are formed by

191 variable densities of abundant bubble-like inclusions of different sizes and which are  
192 monophasic (solid), biphasic (solid + liquid), or triphasic (solid + liquid + gas) (**Figure**  
193 **2G**). Mineral crystals have been detected growing inwards inside allegedly empty  
194 spaces left by larger bubble-like inclusions – these include pyrite cuboctahedrons  
195 and needle-shaped crystals from an iron sulphate mineral according to EDS analysis  
196 (likely szomolnokite,  $\text{Fe}^{2+}\text{SO}_4\cdot\text{H}_2\text{O}$ ) (**Figure 2H,I—figure supplement 3A**).

197 The upper layer from the Ariño AR-1 level is rich in amber pieces of flow-,  
198 droplet-, and stalactite-shaped morphologies, and often showing external and/or  
199 internal desiccation surfaces (**Figure 2B—figure supplement 2**). Small, almost  
200 spherical amber pieces about 1–5 cm in diameter, with an opaque crust similar to the  
201 kidney-shaped amber pieces, are also present in this layer, yet scarcely; their surface  
202 is polished and more regular in patterning (**Figure 2—figure supplement 3B–D**).  
203 Amber pieces range from translucent to opaque, and from light yellow to dark reddish  
204 in colour. One peculiar piece showed subtle, multidirectional surface microscopic  
205 scratches and borings, the latter filled with an undetermined material, neither calcium  
206 carbonate nor gypsum (**Figure 2—figure supplement 3E**).

207

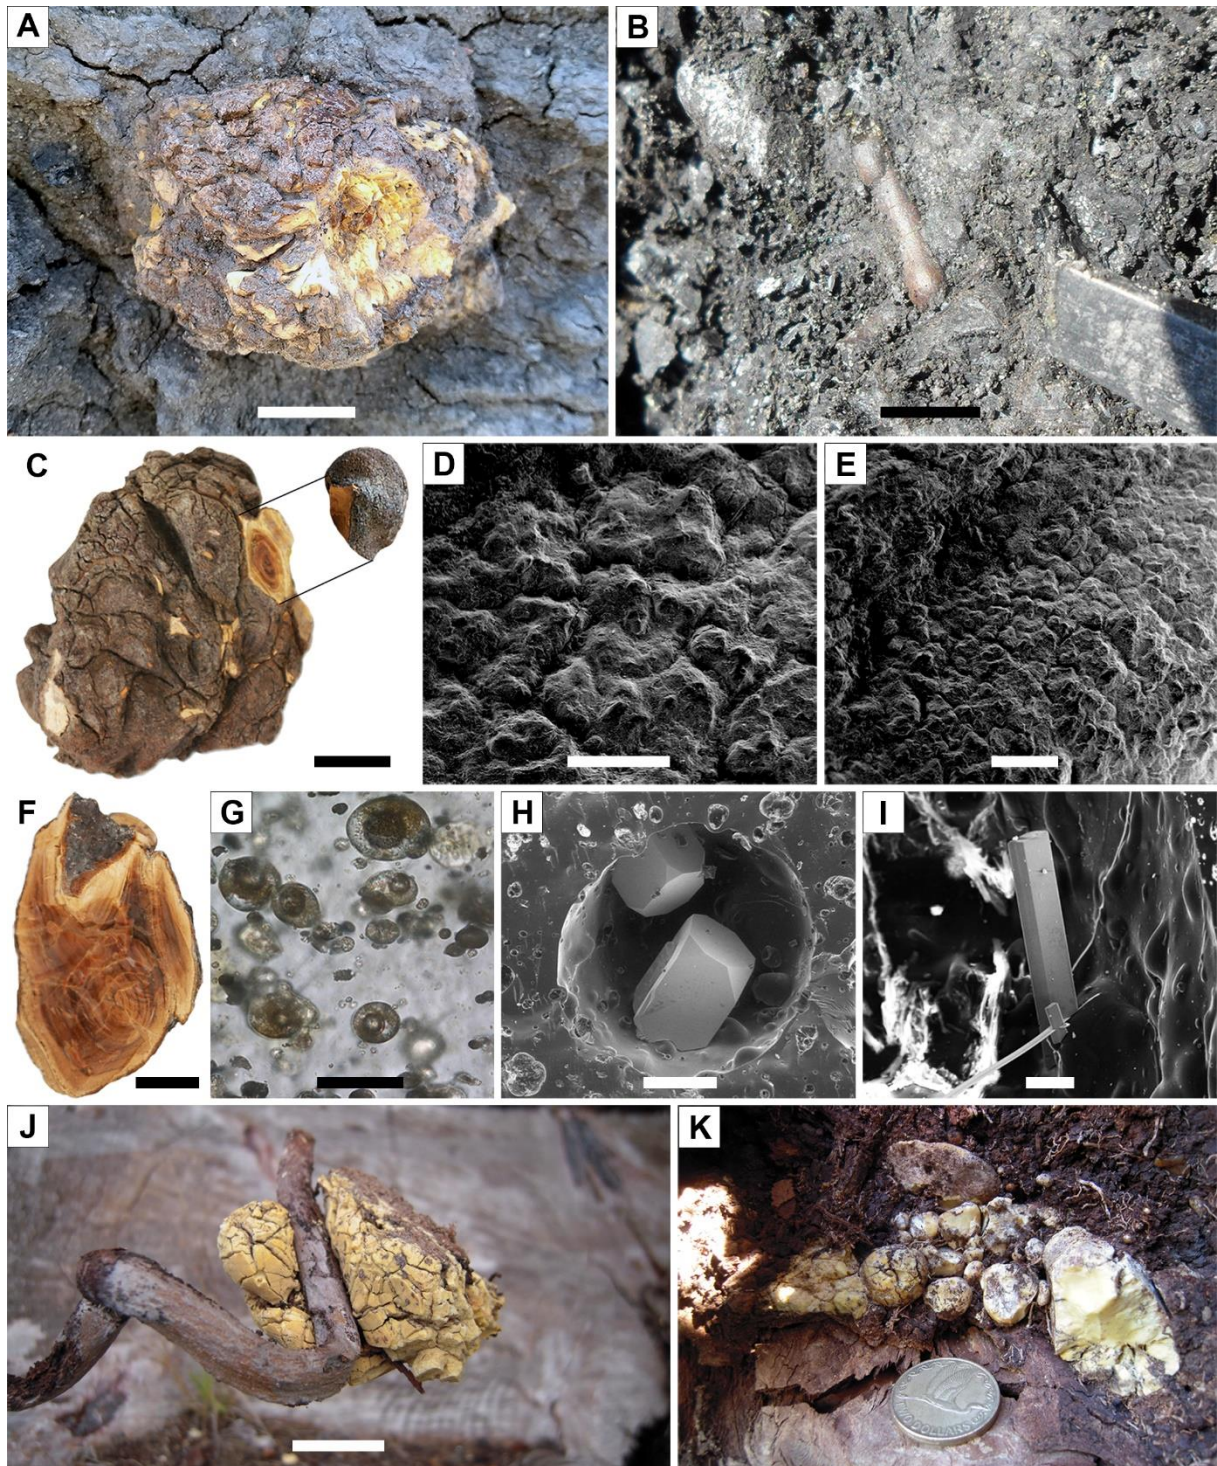

208

209 **Figure 2.** Diversity of amber pieces from the AR-1 level and Pleistocene copal pieces  
210 for comparison. (A) Kidney-shaped amber piece (root layer). (B) Aerial amber piece  
211 (litter layer), corresponding to a resin flow, after partially removing surrounding rock  
212 during fieldwork. (C) Kidney-shaped amber piece (AR-1-A-2019.93) from the root  
213 layer. (D, E) Two different areas of the external surface from a fragment detached

214 from the piece in (C), showing the preserved delicate surface microprotrusions and  
215 no evidence of linear grooves. (F) Kidney-shaped amber piece (root layer) showing  
216 the internal banding pattern (AR-1-A-2019.132). (G) Triphasic (solid + liquid + gas)  
217 bubble-like inclusions in a kidney-shaped amber piece (AR-1-A-2019.130). (H) Two  
218 pyrite cuboctahedrons in an alleged empty space left by a fluid bubble-like inclusion  
219 (amber piece AR-1-A-2019.86). (I) Needle-shaped crystals from an iron sulphate  
220 (likely szomolnokite) growing inward from the walls in an alleged empty space left by  
221 a fluid bubble-like inclusion (amber piece AR-1-A-2019.129). (J) Kidney-shaped  
222 piece of Pleistocene copal associated to an *Agathis australis* root from an overturned  
223 stump in Waipapakauri (North Island, New Zealand). (K) Pleistocene copal pieces  
224 associated to the root system of the same *A. australis* stump; coin 2.65 cm in  
225 diameter. Scale bars, 2 cm (A–C, F, J), 0.5 mm (D), 1 mm (E), 0.03 mm (G), 0.2 mm  
226 (H), and 0.1 mm (I). See also **Supplementary Video 1**.

227

228 The FTIR spectra of two stalactite-shaped amber pieces from Ariño are  
229 dominated by a small C-H stretching band at  $2925\text{ cm}^{-1}$ , an intense C-H band at  $1457$   
230  $\text{cm}^{-1}$ , and an intense carbonyl band at  $1707\text{ cm}^{-1}$  (**Figure 3A—source data 1–3**), all  
231 characteristic of amber (**Grimalt et al., 1988**). Hydroxyl bands near  $3500\text{ cm}^{-1}$  are  
232 present. The Ariño amber spectra are very similar to those from San Just amber,  
233 their main difference being the presence of a small band near  $1200\text{ cm}^{-1}$  in the latter.  
234 On the other hand, the composition of the organic solvent-extractable materials  
235 obtained by GC-MS, comprising the 32.5% of the Ariño amber, is dominated by  
236 labdane resin acids and its diagenetic derivatives, with amberene (I; 1,6-dimethyl-5-  
237 isopentyltetralin) being the major component in the bulk extract (**Figure 3B—figure**  
238 **supplement 1—source data 4**). The labdan-18-oic acids are dominant in the polar

239 fraction of the organic extract from the amber. The identification of the clerodane-  
240 family diterpene **VI** is noteworthy. The analyses show no evidence of significant  
241 terpenes of the pimarane/abietane family and discard the presence of ferruginol. The  
242 Ariño amber does not show a significant content of neither 15-homoamberene (**III**)  
243 nor 1-methylamberene (**X**) (**Figure 3B—figure supplement 1**) (*Kawamura et al.,*  
244 **2018**). This could point to a lack of the corresponding labdanoid alcohols or non-  
245 oxidised C18/C19 labdanoids in the precursor resin, as the diagenesis of these  
246 molecules could lead to 1-methylamberene. The decarboxylation of the labdan-18-oic  
247 acids prevailing in the Ariño amber polar fraction could be the first step in the  
248 diagenesis to amberene and its related compounds, especially isomers of the  
249 labdanoid **VI**, found as a rich distribution of peaks with  $M^+=246$ .

250

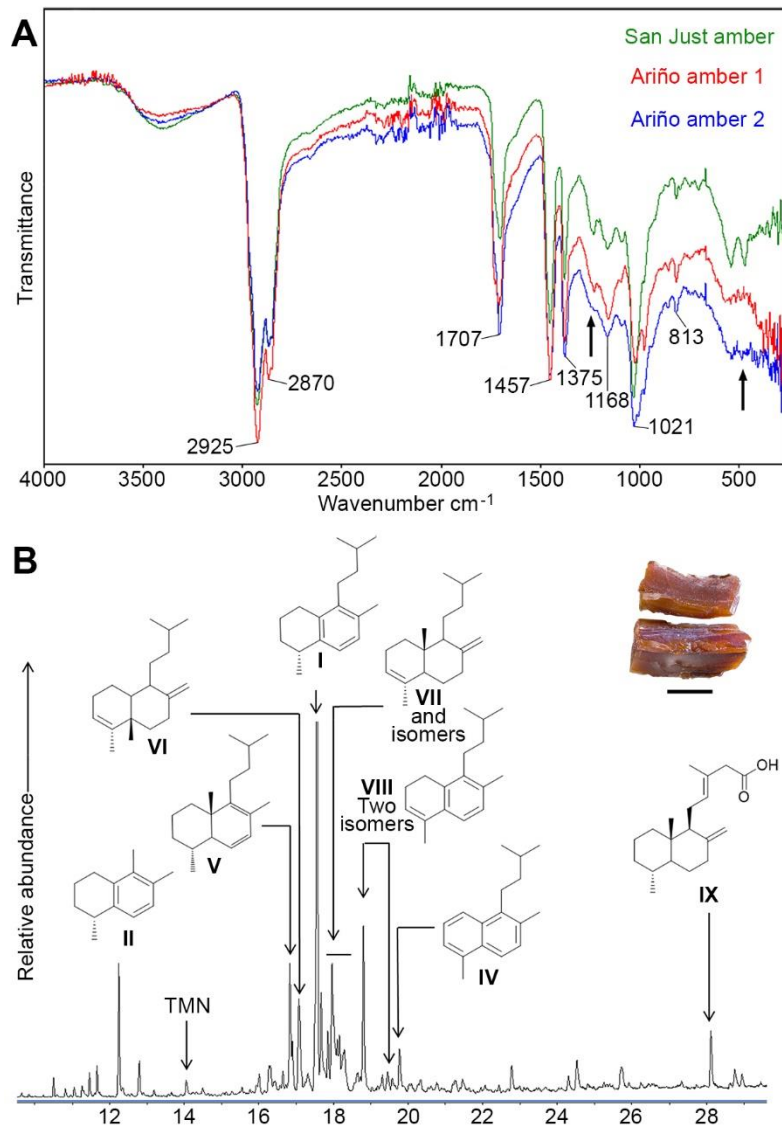

251

252 **Figure 3.** Physicochemical characterisation of the Lower Cretaceous amber from

253 Ariño. (A) Infrared (FTIR) spectra obtained from two aerial amber pieces (litter layer);

254 a spectrum from San Just amber (upper Albian) is provided for comparison; arrows

255 indicate the main differences between Ariño and San Just ambers, at around 1200

256 and 500  $\text{cm}^{-1}$ ; resolution = 4  $\text{cm}^{-1}$ . (B) Gas chromatography-mass spectrometry (GC-

257 MS) trace for the underivatised total solvent extract of aerial amber, showing the

258 structures of the main identified terpenoids, referred herein using Roman numerals

259 (full formulation provided in **Figure 3—figure supplement 1B**); TMN =

260 trimethylnaphthalenes; the analysed aerial amber is shown at the top right (scale bar  
261 0.5 mm).

262

## 263 **Bioinclusions**

264 A total of 166 bioinclusions were obtained out of 918 g of aerial amber (**Figure 4—**  
265 **figure supplement 1**); about one third of them are well to exceptionally well  
266 preserved. Plant inclusions are present, such as numerous fern or conifer trichomes  
267 (not considered in the inclusion recount) and other undetermined remains (**Figure**  
268 **4—figure supplement 1A–E**). The diverse assemblage is namely composed of  
269 arthropods or remains of their activity, such as spiderweb threads (**Figure 4—figure**  
270 **supplement 1F,G**) and coprolites, but also a few vertebrate integumentary remains.  
271 Arthropods are represented by arachnids and 11 insect orders. Arachnid inclusions  
272 belong to mites (Acari) and spiders (Araneae). Mites include a rare trombidiform of  
273 the family Rhagidiidae, an oribatid, and an undetermined six-legged larva (**Figure**  
274 **4A**). One spider offers taphonomic insights (**Figure 4—figure supplement 1H**). Five  
275 amber pieces with arthropods as syninclusions have spiderwebs preserved; although  
276 all are isolated strands, one tangled sample might correspond to a partial web  
277 (**Figure 4—figure supplement 1F**). In the latter, glue droplets on several strands  
278 suggest it belonged to an orb web (**Figure 4—figure supplement 1G**). The insect  
279 orders found in the Ariño amber are jumping bristletails (Archaeognatha), crickets  
280 (Orthoptera), cockroaches (Blattodea), barklice (Psocodea), thrips (Thysanoptera),  
281 whiteflies and aphids (Hemiptera), lacewings (Neuroptera), beetles (Coleoptera),  
282 moths (Lepidoptera), gnats, midges, and other flies (Diptera), and wasps  
283 (Hymenoptera). Archaeognaths are represented by the inclusion of a cercus and a  
284 medial caudal filament. Two orthopterans are poorly preserved, but one could belong

285 to †Elcanidae. A blattodean nymph and an adult have been found, as well as several  
286 remains such as probably blattodean isolated antennae. Among the seven  
287 psocodeans discovered, new taxa probably within the †Archaeotropidae and  
288 Manicapsocidae have been recognised. Thysanopterans are the third most abundant  
289 insect order in the Ariño amber, with 11 specimens (**Figure 4B,C**); three amber  
290 pieces contain more than one thrips as syninclusions. One isolated thrips shows a  
291 thin milky coating (**Figure 4—figure supplement 1I**), also found in other inclusions,  
292 and an infrequent nymph is unusually well preserved (**Figure 4B**). Hemipterans  
293 comprise four representatives of Sternorrhyncha and two incomplete undetermined  
294 specimens. Three of the former have been identified as Aleyrodidae, probably  
295 belonging to the Aleurodicinae (**Figure 4D**), and are preserved in the same amber  
296 piece as syninclusions. In addition, an Aphidoidea is found in an amber piece with  
297 spiderweb strands. The neuropteran record consists of two wing impressions on  
298 amber surfaces probably belonging to Berothidae and a complete specimen, which  
299 could correspond to a †Paradoxosisyrinae (Sisyridae). Five coleopteran specimens  
300 have been discovered, two tentatively identified as belonging to Cantharidae and  
301 Ptinidae. A ditrysian lepidopteran larva, yet incomplete anteriorly, is remarkably well  
302 preserved (**Figure 4E**). Dipterans (**Figure 4F**) are represented by 19 specimens of  
303 the families †Archizelmiridae, Cecidomyiidae, Ceratopogonidae (including at least  
304 one female), Chironomidae, Mycetophilidae, Rhagionidae, Scatopsidae, and  
305 probably Psychodidae. The first group is represented by a well-preserved male within  
306 the genus *Burmazelmira* (**Figure 4F**). Lastly, hymenopterans are the most abundant  
307 insects in Ariño amber, accounting for 34 specimens belonging to the  
308 Platygastroidea, Mymarommatoidea, †Serphitidae, and †Stigmaphronidae (**Figure**



309 **4G–I**). Furthermore, a new vertebrate inclusion is represented by a basal feather  
310 portion of pennaceous structure (**Figure 4J**).

311

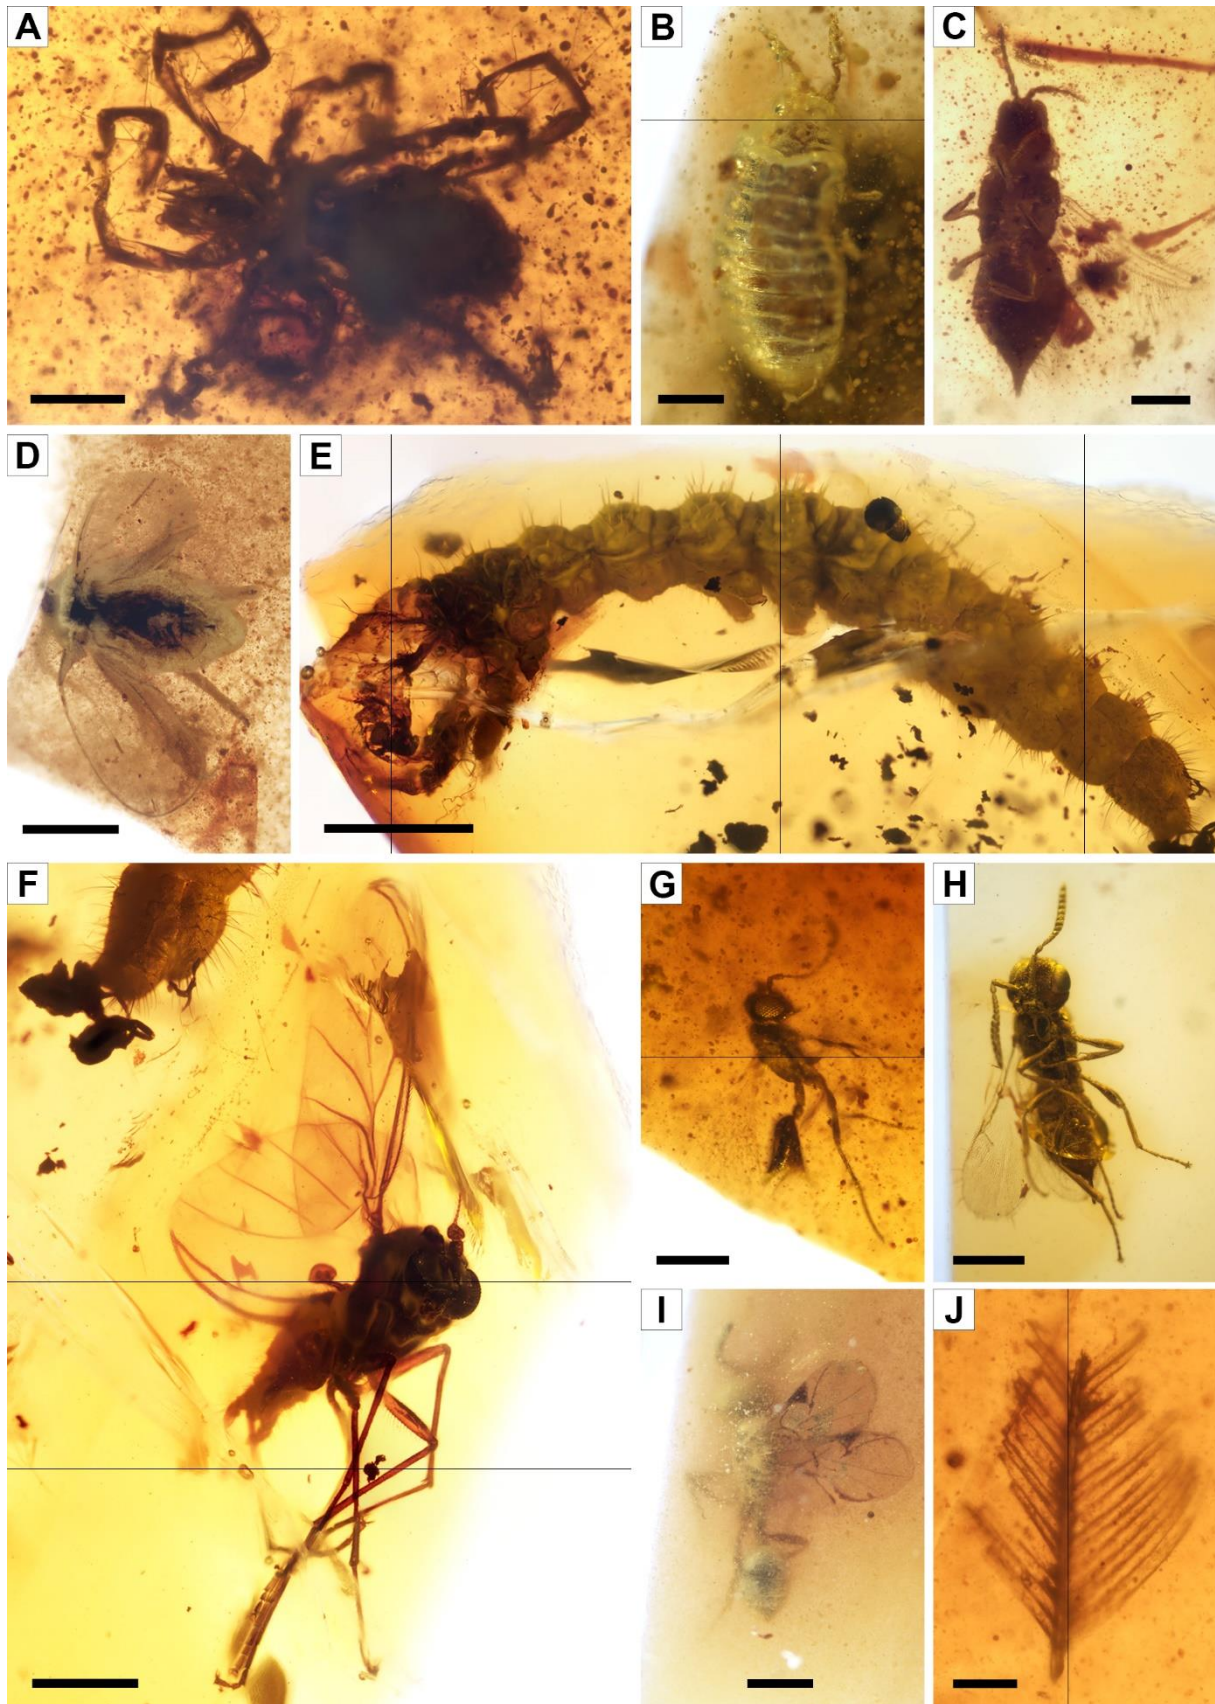

312

313 **Figure 4.** Faunal bioinclusions from the Lower Cretaceous bonebed amber of Ariño.

314 (A) A rhagidiid mite, the oldest known (Acari: Rhagidiidae; AR-1-A-2019.71). (B) An

315 immature thrips (Thysanoptera; AR-1-A-2019.114.2). (C) An adult thrips  
316 (Thysanoptera; AR-1-A-2019.40). (D) A whitefly (Hemiptera: Aleyrodidae; AR-1-A-  
317 2019.100.1). (E) A ditrysian lepidopteran larva (AR-1-A-2019.95.1). (F) A  
318 *Burmazelmira* sp. fly (Diptera: †Archizelmiridae; AR-1-A-2019.95.2). (G) A false fairy  
319 wasp, the oldest known (Hymenoptera: Mymarommatoidea; AR-1-A-2019.61). (H) A  
320 superbly preserved platygastroid wasp (Hymenoptera: Platyastroidea; AR-1-A-  
321 2019.95.3). (I) A serphitid wasp, the oldest known (Hymenoptera: †Serphitidae; AR-  
322 1-A-2019.94.8). (J) A feather fragment of pennaceous structure (Theropoda; AR-1-A-  
323 2019.53). Scale bars, 0.2 mm (A–C, G), 0.5 mm (D, F, H, I), 1 mm (E), and 0.1 mm  
324 (J).

325

## 326 Palaeobotanical and ostracod assemblages

327 Charophytes sampled from the level AR-1 comprise four species belonging to the  
328 families †Clavatoraceae and Characeae. The assemblage is dominated by  
329 †Clavatoraceae, namely by well-preserved fructifications of *Atopochara trivolvis* var.  
330 *trivolvis* (**Figure 5A–D—figure supplement 1A,B**) and *Clavator harrisii* var. *harrisii*  
331 (**Figure 5E–J—figure supplement 1C–E**) (n>100 for each species). The former is  
332 represented by large utricles showing a characteristic triradiate symmetry and  
333 displaying flame-shaped cells at positions a1, a3, b1 and c1 (**Grambast, 1968**); such  
334 configuration is variable in other populations of the same species. Five morphotypes  
335 of *C. harrisii* var. *harrisii* have been distinguished based on the cell disposition at the  
336 abaxial side of the utricle, showing the phylloid imprint flanked at the base by two  
337 small cells and bearing above a complex of five to eleven cells (**Figure 5—figure**  
338 **supplement 1F–J**); although this variety had been previously identified in Ariño,  
339 none of the described morphotypes were evident (**Tibert et al., 2013**), neither in

340 other *C. harrisii* var. *harrisii* populations worldwide. Moreover, several (n=10) portions  
341 of clavatoracean thalli belonging to *Clavatoraxis* sp. have been recovered (**Figure**  
342 **5K**). Lastly, rare occurrences (n=3) of small characean gyrogonites affine to  
343 *Mesochara harrisii* are also present (**Figure 5L**); their determination remains  
344 somewhat uncertain due to the lack of basal plate (**Martín-Closas et al., 2018**).

345 Charcoalified plant remains (fusinite/inertinite) are abundant in the upper amber  
346 layer (**Figure 2—figure supplement 2A**). These correspond to secondary xylem with  
347 strongly araucariacean (1) 2 (3) seriate intertracheary radial pitting and araucarioid  
348 cross-fields. Although they are similar to the araucariacean *Agathoxylon*  
349 *gardoniense*, we prefer to identify these samples as *Agathoxylon* sp. due to  
350 preservation. Other charcoalified wood remains likely belonging to other taxonomic  
351 groups have also been found. Furthermore, a rare sample of amber-filled plant tissue  
352 shows cells elliptic to rounded in cross-section and elongate in longitudinal section,  
353 blunt tips, 20–50 µm in diameter, and with thin walls (somewhat collenchymatous).  
354 Cells are arranged radially, but without evidence of growth rings. These  
355 characteristics suggest that this fossilised tissue might represent suber (cork)  
356 (**Figure 4—figure supplement 1B–E**).

357 The four studied palynological samples (ARN-01–ARN-04) have provided highly  
358 diverse, well-preserved assemblages that include a total of 72 different palynomorph  
359 taxa, i.e., two from freshwater algae, 38 from spores of ferns and allied groups, 21  
360 from gymnosperm pollen grains, and 11 from angiosperm pollen grains (**Figure 5M–**  
361 **T—figure supplement 1K–P, Supplementary Table 1**). Aquatic palynomorphs,  
362 consisting of zygnetacean freshwater algae, are a small proportion of the samples  
363 except for ARN-04, characterised by the abundance of *Chomotriletes minor* (3.87%  
364 of the total palynomorph sum) (**Figure 5M**). Spores numerically dominate the

365 assemblages except for ARN-01. Overall, fern spores (13.48–38.42%), such as  
366 *Appendicisporites* spp. (**Figure 5N**), *Cicatricosisporites* spp., *Cyathidites australis*,  
367 *Cyathidites minor* (**Figure 5O**), and *Gleicheniidites senonicus*, predominate over  
368 those of bryophytes and lycophytes (1.44–2.38%). Gymnosperms are namely  
369 represented by *Inaperturopollenites dubius* (12.79–20.36%) (**Figure 5P**), related to  
370 taxodioid conifers (**Stuchlik et al., 2002**), and the genus *Classopollis* (9.39–15.95%)  
371 (**Figure 5Q**), produced by †Cheirolepidiaceae conifers (**Taylor and Alvin, 1984**).  
372 Araucariacean and bisaccate pollen show low amounts except for the araucariacean  
373 *Araucariacites* spp. (**Figure 5R**), which is particularly abundant in ARN-01 (12.79%).  
374 The abundance of *Eucommiidites* spp., assigned to †Erdtmanithecaceae  
375 gymnosperms, is also relevant (2.90–8.00%) (**Figure 5S**). “*Liliacidites*” *minutus*  
376 (**Figure 5T**) was the most abundant angiosperm pollen in the assemblages (up to  
377 12% in ARN-01).

378 The ostracod fauna recovered from the level AR-1 is comprised of four species  
379 belonging to the families Limnocytheridae, †Cyprideidae, and Cyprididae (**Figure**  
380 **5U–EE—figure supplement 1Q–Y**). Specimens show mostly closed carapaces and  
381 are generally well preserved. The Limnocytheridae are represented by  
382 *Theriosynoecum* cf. *fittoni* (**Figure 5U,V**) (n=20) and *Rosacythere denticulata* (n>70)  
383 (**Figure 5W–BB**). Although the latter species was previously identified in Ariño  
384 (**Tibert et al., 2013**), three variants have now been detected: one with a faint pitting  
385 and extremely small rosette ornamentation (**Figure 5W**), one with a well-developed  
386 rosette (**Figure 5X,Y,AA—figure supplement 1Q–U**), and one with strongly  
387 developed rosette and spine-like nodes locally generated at the postero-dorsal and  
388 postero-ventral parts of the carapace (**Figure 5Z,BB—figure supplement 1V–Y**).  
389 †Cyprideidae and Cyprididae are found for the first time in Ariño, represented by the

390 species *Cypridea* cf. *clavata* (n=35) (**Figure 5CC,DD**) and *Mantelliana* sp. (n=12)  
391 (**Figure 5EE**), respectively.

392

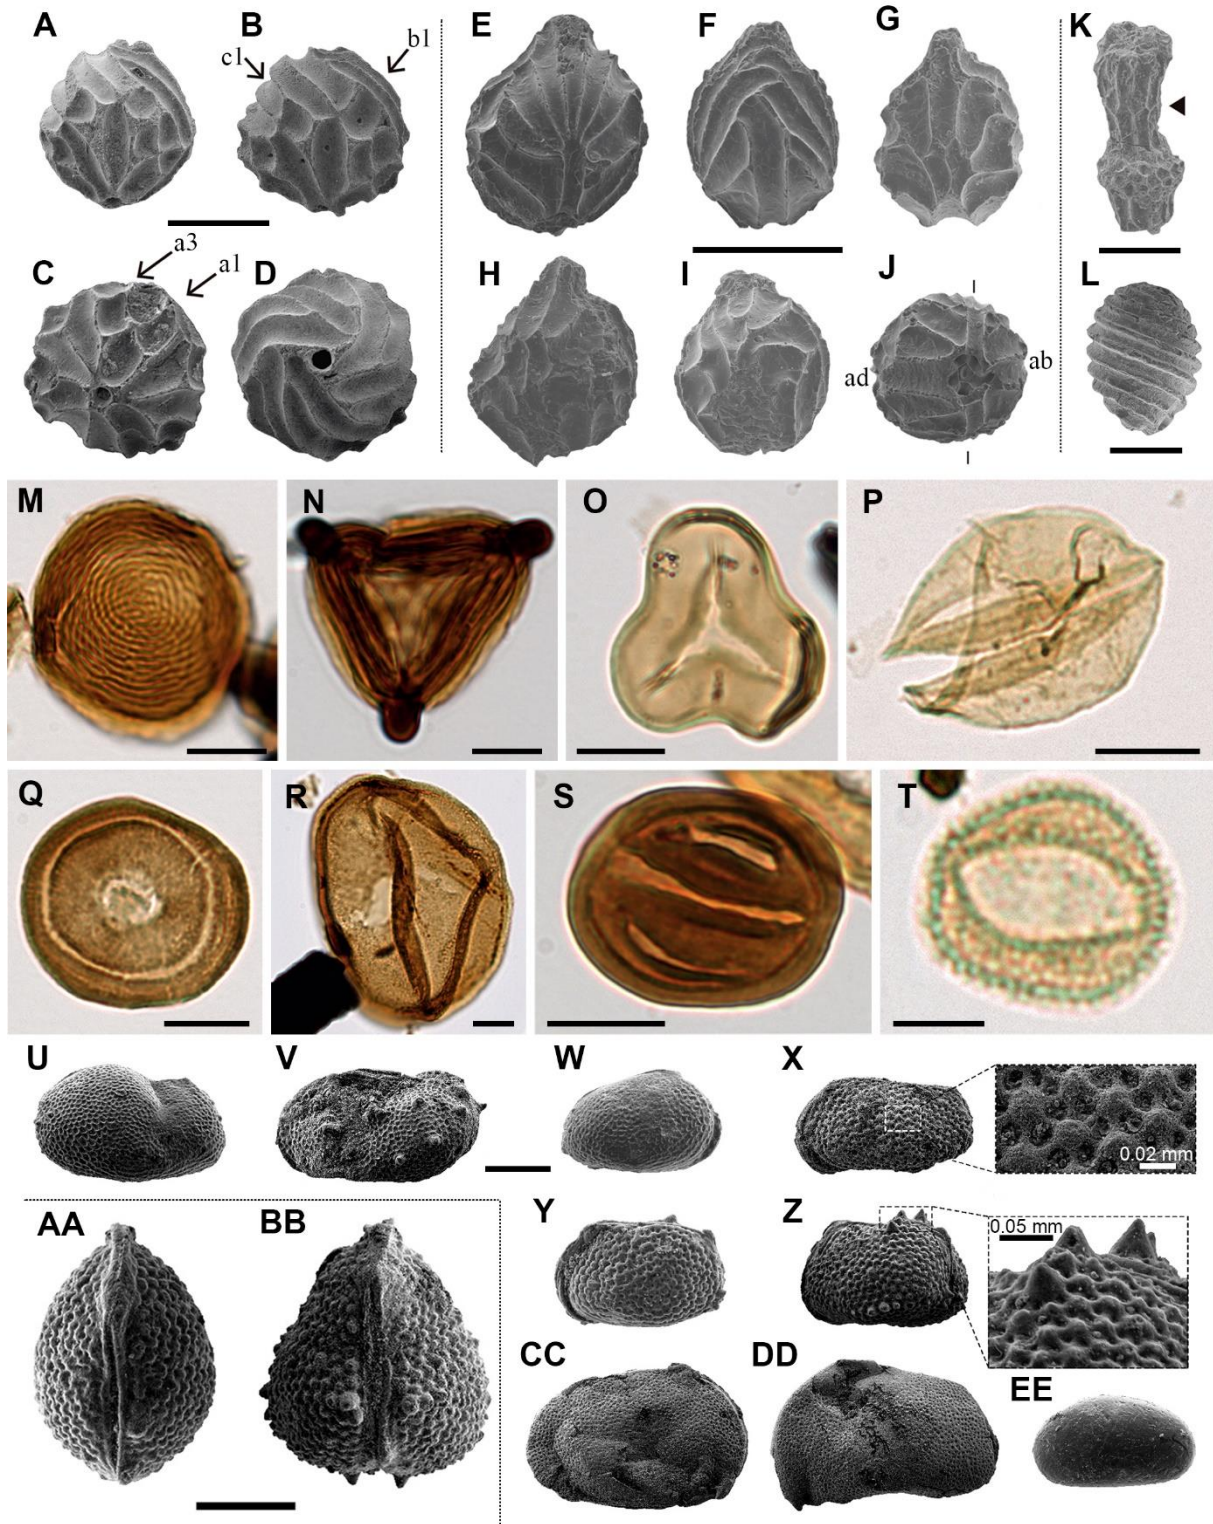

393

394 **Figure 5.** Charophyte (A–L), palynomorph (M–T), and ostracod (U–EE) records  
395 sampled from level AR-1 of Ariño. (A–D) *Atopochara trivolvis* var. *trivolvis*  
396 (†Clavatoraceae): (A, B) Lateral views (AR-1-CH-004 and AR-1-CH-005,  
397 respectively); (C) Basal view (AR-1-CH-007); (D) Apical view (AR-1-CH-008); cell  
398 lettering after **Grambast (1968)**. (E–J) *Clavator harrisii* var. *harrisii* (†Clavatoraceae):  
399 (E) Lateral view (AR-1-CH-009); (F) Adaxial view (AR-1-CH-011); (G) Abaxial view  
400 morphotype II (AR-1-CH-013); (H) Abaxial view morphotype III (AR-1-CH-014); (I)  
401 Abaxial view morphotype IV (AR-1-CH-015); (J) Basal view (AR-1-CH-017) with  
402 indication of adaxial (ad) and abaxial (ab) sides. (K) *Clavatoraxis* sp.  
403 (†Clavatoraceae) (AR-1-CH-019); the arrowhead indicates the zig-zag line at the  
404 central part of the internode. (L) aff. *Mesochara harrisii* (Characeae) in lateral view  
405 (AR-1-CH-001). (M) *Chomotriletes minor* (ARN-03). (N) *Appendicisporites*  
406 *tricornitatus* (ARN-01). (O) *Cyathidites minor* (ARN-02). (P) *Inaperturopollenites*  
407 *dubius* (ARN-04). (Q) *Classopollis* sp. (ARN-02). (R) *Araucariacites hungaricus*  
408 (ARN-01). (S) *Eucommiidites minor* (ARN-01). (T) "*Liliacidites*" *minutus* (ARN-01). (U,  
409 V) *Theriosynoecum* cf. *fittoni* (Limnocytheridae): (U) Right lateral view, female  
410 carapace (AR-1-OS-001); (V) Left lateral view, male carapace (AR-1-OS-002). (W–  
411 BB) *Rosacythere denticulata* (Limnocytheridae): (W) Female? carapace, right lateral  
412 view, variant with extremely small rosette ornamentation (simply reticulated form)  
413 (AR-1-OS-006); (X) Male carapace of the variant with well-developed rosette  
414 ornamentation, left lateral view (AR-1-OS-011), and detail of the ornamentation; (Y)  
415 Female carapace of the variant with well-developed rosette ornamentation, left lateral  
416 view (AR-1-OS-007); (Z) Female carapace of the variant with strongly developed  
417 rosette ornamentation and spine-like nodes, left lateral view (AR-1-OS-015), and  
418 detail of the spine-like node ornamentation; (AA) Female carapace of the variant with

419 well-developed rosette ornamentation, dorsal view (AR-1-OS-012); **(BB)** Female  
420 carapace of the variant with strongly developed rosette ornamentation and spine-like  
421 nodes, dorsal view (AR-1-OS-018), showing intraspecific variability. **(CC, DD)**  
422 *Cypridea* cf. *clavata* (†Cyprideidae): **(CC)** Specimen in right lateral view (AR-1-OS-  
423 004); **(DD)** Specimen in left lateral view (AR-1-OS-005). **(EE)** *Mantelliana* sp.  
424 (Cyprididae) (AR-1-OS-003), right lateral view. Scale bars, 0.5 mm (A–J), 0.25 mm,  
425 (K) 0.2 mm (L, U–EE), 0.01 mm (M–S), and 0.005 mm (T). See also **Supplementary**  
426 **Table 1.**

427

## 428 Discussion

429

430 The kidney-shaped, bioinclusion-lacking amber pieces from AR-1's lower amber-  
431 bearing layer were produced by roots. Subterranean accumulations from both  
432 Recent/subfossil resin in modern forests and amber in geological deposits have been  
433 partly attributed to roots (**Langenheim, 1967, 2003; Henwood, 1993; Martínez-**  
434 **Delclòs et al., 2004; Seyfullah et al., 2018**). Although the resiniferous capacity of  
435 roots is well known (**Langenheim, 2003**), observations of resin attached and/or  
436 associated with roots from both angiosperms and gymnosperms have been  
437 occasional (**Langenheim, 1967; Seyfullah et al., 2018**). Our field observations of  
438 late Pleistocene copal pieces produced and still attached to roots, covered by original  
439 soil, in an *Agathis australis* overturned stump, formerly referred to but not figured  
440 (**Najarro et al., 2009; Speranza et al., 2015**), show similar morphologies to the Ariño  
441 kidney-shaped amber pieces (**Figure 2J,K**). The Ariño's lower amber layer is  
442 interpreted as a root layer where the abundant and complete amber pieces are  
443 strictly in situ, i.e., they are located exactly where the roots of the resiniferous trees



444 exuded this resin in the subsoil (**Figure 6A**). This level immediately overlies  
445 carbonates that display edaphic features at the top (**Figure 1E,F**). It has high lateral  
446 continuity and lacks aerial amber or charcoaled plant remains (**Figures 1, 2A—**  
447 **figure supplement 1**). Also, the fragile surface protrusions and microprotrusions of  
448 the kidney-shaped amber pieces from this layer would not have preserved even if  
449 minimal biostratinomic transport or other processes entailing abrasion had occurred  
450 (**Figure 2C–E**). This is the first time strictly in situ amber is reported; the scarcely-  
451 fossiliferous, autochthonous-parautochthonous Triassic amber droplets from the  
452 Dolomites are preserved in a palaeosol (**Schmidt et al., 2012; Seyfullah et al.,**  
453 **2018**), but they are strictly ex situ, as the resin at least felt by gravity from their  
454 above-ground exudation location to the forest floor (**Figure 6A**). Although other  
455 amber-bearing outcrops from the Iberian Peninsula have commonly yielded kidney-  
456 shaped amber pieces (**Alonso et al., 2000; Peñalver et al., 2007; Najarro et al.,**  
457 **2009**), these appear fragmented and in pockets together with aerial amber and  
458 generally have smoother surfaces and more regular morphologies than those from  
459 Ariño. The kidney-shaped amber pieces have further noteworthy characteristics.  
460 Firstly, the amber pieces show marked internal bands composed of variable densities  
461 of mono-, bi-, or triphasic bubble-like inclusions (**Figure 2F,G**). Although these  
462 microscopic inclusions likely correspond to fossilised sap-resin emulsions (**Lozano**  
463 **et al., 2020**), at least partially, they show more complex and previously  
464 undocumented morphologies and arrangements. These microinclusions have the  
465 potential to provide key data on taphonomy and the conditions under which resin  
466 production occurred. Moreover, pyrite cuboctahedrons (**Figure 2H**) are usually found  
467 as mineralisations in the alleged empty spaces left by fluid bubble-like inclusions  
468 within amber (**Alonso et al., 2000**); they have been related to early diagenesis in

469 reducing environments produced by anaerobic bacteria (*Allison, 1990*). In contrast,  
470 the iron sulphate minerals growing in these spaces (*Figure 2I—figure supplement*  
471 *3A*) have not been previously reported; they could have formed during late  
472 diagenesis under oxidising conditions after the input of oxygenised water into the  
473 amber (*Allison, 1990*). Secondly, the kidney-shaped amber pieces from Ariño lack  
474 the coating of resinicolous fungal mycelia otherwise common in Cretaceous ambers  
475 (*Speranza et al., 2015*). Both the mono- to multiphasic inclusions and the lack of  
476 fungal coating might be related to the likely partial flooding of the Ariño forest soil,  
477 typical of swampy environments. Although resin can solidify on or within the forest  
478 soil in tropical or subtropical climate environments (*Henwood, 1993*), plant  
479 macrofossils are usually highly altered and poorly preserved in soils and coal  
480 deposits (*Delclòs et al., 2020*). The absence of roots associated with the kidney-  
481 shaped amber pieces in the root layer could be explained by their differential  
482 fossilisation in the partly flooded soil.

483 The upper amber-bearing layer from Ariño's AR-1 level is rich in aerial amber  
484 pieces (*Figure 2B—figure supplement 2*). This amber type results from fluid resin  
485 falling on the ground from the trunk or branches along the gravity gradient (*Martínez-*  
486 *Delclòs et al., 2004*). The aerial amber pieces commonly have delicate  
487 morphologies and preserve external desiccation surfaces, both elements indicating  
488 very limited transport. Overall, the upper layer is interpreted as a litter layer namely  
489 resulting from the autochthonous-parautochthonous accumulation of strictly ex situ  
490 aerial amber pieces, but also occasionally containing amber pieces showing surface  
491 polishing or scratching and thus likely being more allochthonous in nature, i.e.,  
492 transported and deposited far away from its production environment (*Figure 6A*).  
493 Moreover, the absence of strictly in situ kidney-shaped amber pieces in the litter layer

494 suggests that AR-1 corresponds to a single cycle of forest floor installation-  
495 destruction. On the contrary, charcoaled wood remains are abundant in this layer;  
496 these were previously found in Ariño and were related to wildfires (**Villanueva-**  
497 **Amadoz et al., 2015; Vajda et al., 2016**), which have been deemed as promoters of  
498 resin production and accumulation (**Najarro et al., 2010; Seyfullah et al., 2018**). On  
499 the other hand, the aerial amber is highly fossiliferous, with 145 bioinclusions/kg  
500 (excluding coprolites, spiderwebs, and undetermined bioinclusions). Although  
501 determining amber bioinclusion richness is prone to multiple biases (e.g., bioinclusion  
502 recounting should be ideally limited to aerial amber, as kidney-shaped amber  
503 fragments were almost certainly devoid of bioinclusions), this value is among the  
504 highest reported worldwide. Richness data from other Cretaceous Albian to  
505 Cenomanian amber localities range from about 10 to 80 inclusions/kg (**Grimaldi et**  
506 **al., 2002; Néraudeau et al., 2002; Girard et al., 2013; Peñalver et al., 2018; Zheng**  
507 **et al., 2018**), although values surpassing the 500 insects/kg have been exceptionally  
508 reported (**Rasnitsyn and Quicke, 2002**). A few bioinclusions are covered by a white  
509 foam consisting of microscopic bubbles produced by decomposition fluids during  
510 early diagenesis (**Figure 4—figure supplement 1**), similar to that commonly  
511 observed in the Eocene Baltic amber (**Martínez-Delclòs et al., 2004**), but otherwise  
512 rare among Cretaceous ambers.

513 The charophyte, palynological, and ostracod data provided herein are also  
514 indicative of a very limited transport of these remains prior to burial. The utricles of  
515 the two clavatoracean charophytes found are well preserved and abundant,  
516 suggesting that these remains are autochthonous. The occurrence of clavatoracean  
517 portions of thalli associated with the fructifications supports this inference. The  
518 studied palynological samples show conspicuous abundances of pollen related to

519 araucariacean trees and angiosperms in ARN-01 (root layer), which could indicate  
520 parautochthony based on their limited pollen production and dispersal potential  
521 (**Taylor and Hu, 2010**). Samples ARN-03 and ARN-04 (litter layer) contain low  
522 araucariacean and angiosperm pollen and high amounts of allochthonous wind-  
523 transported miospores such as *Cyathidites* spp., *Inaperturopollenites dubius*, and  
524 *Classopollis* spp., which suggest chiefly allochthonous assemblages. In contrast,  
525 ARN-02 (at the top of the root layer) shows a parautochthonous-allochthonous  
526 transitional assemblage based on an increase of fern spores and erdtmanithecalean  
527 pollen, as well as lower values of araucariacean pollen than ARN-03 and ARN-04.  
528 The previous palaeobotanical accounts from Ariño concluded parautochthony based  
529 on the good palynomorph preservation, some samples even showing their original  
530 tetrad configuration, although they recognised that some charcoaliified wood remains  
531 could be allochthonous (**Villanueva-Amadoz et al., 2015; Vajda et al., 2016**). Lastly,  
532 the studied ostracods constitute a relatively rich assemblage characterised by  
533 abundant specimens with closed carapaces (**Figure 5AA, BB**), which together with  
534 the low percentage of broken individuals points out to autochthonous remains  
535 (**Trabelsi et al., 2021**).

536 The previous taphonomic accounts on the Ariño vertebrates indicated the  
537 absence or lowest grade of biostratinomic transport. The abundant vertebrate fossils  
538 are namely found in monotaxic (occasionally bitaxic) concentrations of well-  
539 preserved, articulated, or semi-articulated remains (**Alcalá et al., 2012, 2018;**  
540 **Buscalioni et al., 2013; Villanueva-Amadoz et al., 2015**). Coprolites, likely  
541 dinosaurian, show a palynomorph composition similar to that of the rock (**Vajda et**  
542 **al., 2016**). By integrating all the taphonomic data from the diverse palaeobiological  
543 elements from Ariño, we can conclude that the great majority of the assemblage,

544 except for some pollen and charcoaliified plant material, as well as a small  
545 percentage of the amber, had an autochthonous or parautochthonous origin, and  
546 therefore roughly inhabited or was produced in the same area where it fossilised.  
547 This circumstance, although critical for inferring reliable data on the palaeoecosystem  
548 (**Martínez-Delclòs et al., 2004**), remains infrequent among palaeontological  
549 deposits, particularly those jointly preserving dinosaur remains and fossiliferous  
550 amber. Indeed, the three previously reported localities where fossiliferous amber was  
551 found associated with dinosaur bonebeds, all from the Late Cretaceous, show clear  
552 signs of being either allochthonous or clearly mixed assemblages in which at least a  
553 substantial part of the vertebrate remains suffered significant transport prior to burial  
554 (**Néraudeau et al., 2003; Currie et al., 2008; DePalma, 2010**): (1) Fouras/Bois Vert  
555 (= “Plage de la Vierge”) was interpreted as resulting from a catastrophic event such  
556 as a storm in a coastal estuarine environment, with the fragmentary bones showing  
557 evidence of considerable pre-burial transport; however, amber was assumed to be  
558 not heavily transported due to the lack of rounding (**Néraudeau et al., 2003**); (2) the  
559 Pipestone Creek monodominant vertebrate assemblage corresponds to  
560 disarticulated bones formed by a fluvial allochthonous accumulation in a vegetated  
561 floodplain, and interpreted as a mass mortality event; no taphonomic assessment for  
562 the amber was provided (**Tanke, 2004; Currie et al., 2008; Cockx et al., 2020**); and  
563 (3) Bone Butte’s Stratum 11 was reconstructed as a mixed (~70/30)  
564 autochthonous/allochthonous vertebrate assemblage deposited in a river oxbow lake;  
565 amber showed no signs of significant transport (**DePalma, 2010**). From the  
566 diagenetic standpoint, a high maturity of the Ariño amber samples is inferred based  
567 on the absence of exocyclic methylenic bands at 880 cm<sup>-1</sup>, 1640 cm<sup>-1</sup>, and 3070 cm<sup>-1</sup>  
568 in the FTIR spectra, in accordance with their Cretaceous age (**Grimalt et al., 1988**).

569 Furthermore, there is no significant difference in the distribution of  
570 trimethylnaphthalene isomers between the Ariño amber and the other amberene-rich  
571 Cretaceous Iberian ambers in the GC-MS analyses (*Menor-Salván et al., 2016*),  
572 suggesting a similar thermal and diagenetic history (*Strachan et al., 1988*).

573 Identifying which plant sources originated the resin accumulations that led to the  
574 present amber deposits is still contentious, and different conifer groups have been  
575 proposed for the Cretaceous: †Cheirolepidiaceae, Araucariaceae, and Cupressaceae  
576 in Laurasia and other groups such as †Erdtmanithecales in Gondwana (*Menor-*  
577 *Salván et al., 2016; Seyfullah et al., 2020*). The GC-MS results (*Figure 3B—figure*  
578 *supplement 1*) classify the Ariño amber among the amberene-rich group of  
579 Cretaceous Iberian ambers. On that regard, Ariño shows the same distribution as  
580 other Iberian ambers such as those from Peñacerrada I and San Just in terpenes **I**,  
581 **II**, **V**, **VI**, and the alkylnaphthalene **IV**, resulting from the labdane aromatisation, as  
582 well as in the overall diterpene composition (*Menor-Salván et al., 2016*). This  
583 amberene-rich group is distinguished from the abietane-rich group of Cretaceous  
584 Iberian ambers (e.g., El Soplao amber) in the lack of significant terpenes from the  
585 pimarane/abietane family as well as ferruginol, a common biomarker of extant  
586 Cupressaceae (*Menor-Salván et al., 2016*). Instead, the clerodane-family diterpene  
587 **VI** found in Ariño amber, a biomarker of the family Araucariaceae (*Cox, et al., 2007*),  
588 could indicate that the botanical source of the amber is related to *Araucaria/Agathis*.  
589 In fact, the resin of *Araucaria bidwillii* is rich in kolavenic acid (*Cox et al., 2007*),  
590 which might be a biological precursor of **VI**. The Ariño amber differs from extant  
591 Araucariaceae in the lack of pimarane/abietane-class terpenoids. It is possible that  
592 early Araucariaceae lacked the biochemical routes of tricyclic diterpenoids that extant  
593 representatives possess (*Menor-Salván et al., 2016*). In any case, the most

594 plausible stance for now is to regard the Ariño amber as resulting from araucariacean  
595 resin. The finding of charcoalfied *Agathoxylon* sp. supports this stance, although  
596 other types of charcoalfied wood likely belonging to other taxonomic groups have  
597 been found in Ariño. The presence of araucariacean remains as bioinclusions in  
598 Albian amber from the Peñacerrada I locality was proposed as evidence for an  
599 araucariacean resin-producing tree (**Kvaček et al., 2018**). Araucariaceans have also  
600 been proposed as the source of other Lower Cretaceous ambers such as those from  
601 Lebanon, Myanmar, or France (**Poinar et al., 2007; Perrichot et al., 2010; Seyfullah**  
602 **et al., 2018**).

603 Our charophyte, palynological, and ostracod data support the dating of the level  
604 AR-1 as early Albian age (around 110 Ma), as previously proposed for Ariño and,  
605 more generally, the whole Escucha Fm. (**Alcalá et al., 2012; Tibert, 2013;**  
606 **Villanueva-Amadoz et al., 2015; Bover-Arnal et al., 2016; Vajda et al., 2016**). The  
607 whole timespan of the co-occurrence of the charophytes *Atopochara trivolvis* var.  
608 *trivolvis* and *Clavator harrisii* var. *harrisii* is late Barremian–early Albian. However, in  
609 the late Barremian–early Aptian timespan, these species are associated to *A. trivolvis*  
610 var. *triquetra* (**Pérez-Cano et al., 2020**). Based on the occurrence of homogeneous  
611 populations of *A. trivolvis* var. *trivolvis*, the studied assemblage is assigned to the  
612 upper Aptian–lower Albian European *Clavator grovesii* var. *corrugatus* (= *Clavator*  
613 *grovesii* var. *lusitanicus*) biozone of **Riveline et al. (1996)**. This view is  
614 complementary to that based on the previously found co-occurrence in Ariño of  
615 *Clavator harrisii* var. *harrisii* and *Clavator harrisii* var. *zavialensis* indicating an early  
616 Albian age (**Tibert et al., 2013**). The oldest occurrence of *A. trivolvis* var. *trivolvis* has  
617 recently been reported from the upper Barremian (**Pérez-Cano et al., 2020**), but this  
618 variety is more characteristic of upper Aptian–Albian deposits (**Martín-Closas, 2000**).

619 Regarding the palynomorphs, and in accordance with the age inferred by **Peyrot et**  
620 **al. (2007)**, the occurrence of *Retimonocolpites dividuus* (**Figure 5—figure**  
621 **supplement 1N**) in ARN-03 indicates an age not older than the late Aptian (**Burden**  
622 **and Hills, 1989**), and the low occurrence of *Tricolpites* sp. (**Figure 5—figure**  
623 **supplement 1P**) indicates a lower Albian age for the studied level (**Tanrikulu et al.,**  
624 **2018**).

625 The palaeoecological reconstruction of the coastal swamp forest of Ariño that  
626 the data herein presented has allowed is remarkably complete. Floristically, the  
627 ecosystem was composed of mixed communities of gymnosperms (namely  
628 taxodioids and cheirolepids, but also araucariaceans), ferns, and angiosperms as  
629 indicated by the palynological assemblages previously obtained (**Villanueva-**  
630 **Amadoz et al., 2015; Vajda et al., 2016**) and the more diverse account presented  
631 herein, which is based on larger (or complementary in some aspects) data sampling.  
632 Based on coprolite contents, such plants were consumed by the ornithopod and  
633 nodosaurid dinosaurs described from the site (**Alcalá et al., 2012; Vajda et al.,**  
634 **2016**). As extant taxodioids are namely comprised of species with a high water  
635 requirement, these trees possibly were subjected to periodic flooding similarly to the  
636 bald cypress in modern swamps (**Farjon, 2005**). The extinct cheirolepids were  
637 encompassed from succulent, shrubby xerophytes to tall forest trees adapted to a  
638 wide range of habitats, from coasts to uplands slopes, namely in hot and/or dry  
639 climates from lower latitudes (**Anderson et al., 2007**). Moreover, the Ariño swamp  
640 local flora was also likely encompassed by anemiacean, dicksoniacean, and/or  
641 cyatheacean ferns growing as riparian or in the understorey (**Van Konijnenburg-Van**  
642 **Cittert, 2002**). †Erdtmanithecales, and angiosperms, particularly those of lauralean  
643 and chloranthacean affinity, inhabited disturbed and riparian areas (**Doyle et al.,**



644 **2008**). The diversity of the charophyte and ostracod fauna studied herein is higher  
645 than the previously described by **Tibert et al. (2013)**, which so far can be explained  
646 based on palaeoecological constraints, notably the water salinity parameter, or  
647 sampling differences. Both charophytes and ostracods lived in shallow permanent  
648 water bodies from the freshwater swamp and were well adapted to fluctuating  
649 salinities resulting from marine inputs. The presence of the *Theriosynoecum-*  
650 *Cypridea-Mantelliana* ostracod association strongly evidences freshwater to slightly  
651 saline permanent water bodies (**Horne, 2009**). The intraspecific variability observed  
652 on the carapace ornamentation within the *Rosacythere denticulata* specimens is  
653 regarded as ecophenotypic (**Sames, 2011**), and could indicate an episodic increase  
654 in salinity and/or a variation of salinity, evolving towards brackish conditions.

655 The terrestrial arthropod community of the Ariño swamp forest was very  
656 diverse. Spiders, free-roaming or sit-and-wait lurking predators on the forest canopy  
657 or floor (**Foelix, 2011**), inhabited the palaeoecosystem, some likely using orbicular  
658 webs to hunt the abundant flying insects. The soil-dwelling arthropod fauna consisted  
659 of, at least, mites, jumping bristletails, cockroaches, and psocids, all of which were  
660 important for nutrient recycling (**Levings and Windsor, 1985**). The finding of a  
661 rhagidiid mite (**Figure 4A**) is extraordinary, as the fossil record of this predatory  
662 group was limited to a few specimens in Eocene amber (**Judson and Wunderlich,**  
663 **2003**). The Ariño psocid fauna differs from those previously described from other  
664 Iberian ambers, and some specimens will be described as new taxa. Extant psocids  
665 feed on algae, lichens, and fungi from diverse warm and humid habitats; such  
666 autoecology was likely already present in the group during the Cretaceous, rendering  
667 them common inhabitants of the resiniferous forests (**Álvarez-Parra et al., 2020b**).  
668 The Ariño amber insect groups with phytophagous feeding habits include thrips,

669 hemipterans, and orthopterans. The presence of several thrips as syninclusions  
670 could suggest aggregative behaviour. The three aleyrodid hemipterans found are  
671 also preserved as syninclusions (**Figure 4I**); the extant relatives of these small sap-  
672 sucking insects mostly inhabit angiosperms (**Martin et al., 2000**), contrary to the  
673 gymnosperm affinity of the Cretaceous resiniferous trees. Fossil immature  
674 thysanopterans are rare, and the Ariño immature specimen could represent an early-  
675 stage nymph based on habitus, size, and antennal annulations and microtrichia  
676 (**Figure 4B**) (**Vance, 1974**).

677 Holometabolous insects, overwhelmingly diverse and ecologically paramount in  
678 modern ecosystems, are well represented in Ariño amber. The exceptional discovery  
679 of a lepidopteran caterpillar, very scarce in Cretaceous ambers (**Haug and Haug,**  
680 **2021**) and unprecedented in Iberian amber, implies herbivory not only by adult but  
681 also by immature insects in the palaeoecosystem (**Figure 4E**). The two beetle groups  
682 tentatively identified, ptinids and cantharids, have been previously found in Iberian  
683 amber (**Peris, 2020**). These, according to the habits of extant relatives, are good  
684 candidates for having engaged in trophic or even reproductive interactions with  
685 plants, as Cretaceous beetles –including some from Iberian amber– are known to  
686 have fed on pollen from both gymnosperm and angiosperms, acting as pollinators  
687 (**Peris et al., 2020**). The identified dipteran groups presently show various feeding  
688 habits, including phytophagy, mycophagy, predation, and ectoparasitism (**McAlpine**  
689 **et al., 1981**). Regarding the latter, female ceratopogonids likely fed on vertebrate  
690 blood, probably that from Ariño's dinosaurs according to data from other Iberian  
691 ambers (**Pérez-de la Fuente et al., 2011**). As the larval stages and adults of most of  
692 the identified dipteran groups chiefly inhabit warm and moist, often aquatic,  
693 environments such as diverse wetlands (**McAlpine et al., 1981**), these insects likely

694 thrived in the tropical-subtropical swamp of Ariño. The genus *Burmazelmira* is  
695 currently composed of two species from younger ambers; although the discovered  
696 *Burmazelmira* sp. male (**Figure 4F**) is similar to *B. grimaldii* from San Just amber  
697 (**Arillo et al., 2018**), it shows morphological differences that could warrant describing  
698 a new taxon. Lastly, the hymenopteran groups found in Ariño amber are comprised  
699 of small to minute forms generally assumed to be idiobiont parasitoids of insect eggs.  
700 Platygastroids are the most abundant hymenopterans in Ariño amber, several of  
701 them superbly preserved (**Figure 4H**); their predominance is consistent with that  
702 observed in other Cretaceous ambers (**Ortega-Blanco et al., 2014**). One  
703 mymaromatoid specimen (**Figure 4G**) is similar to *Galloromma turoloensis*  
704 (†Gallorommatidae) from San Just amber (**Ortega-Blanco et al., 2011**). The Ariño  
705 serphitids and mymaromatoids represent the oldest records worldwide for these  
706 groups. The Ariño amber has also yielded vertebrate remains, i.e., the oldest known  
707 mammalian hair preserved in amber (**Álvarez-Parra et al., 2020a**) and the  
708 pennaceous feather fragment reported herein (**Figure 4J**). These instances  
709 showcase the potential of this amber to provide integumentary remains of the  
710 vertebrates otherwise preserved as skeleton material in the site's rocks.

711       Considering the extraordinary abundance and diversity of fossils that both the  
712 rocks and the amber have yielded, Ariño can be regarded as the most significant  
713 locality to date in which fossiliferous amber has been found associated with a  
714 dinosaur bonebed (**Figure 6B**). Although the amber palaeodiversity from Fouras/Bois  
715 Vert (France) could potentially match that of Ariño (**Perrichot et al., 2007; Tihelka et**  
716 **al., 2021**), the known vertebrate record from Ariño is two orders of magnitude richer,  
717 and more complete (**Néraudeau et al., 2003**). The opposite occurs in both the  
718 Pipestone Creek (Canada) and the Bone Butte (USA) localities – whereas their

719 vertebrate/dinosaur records are at least comparable (clearly superior for Bone Butte)  
720 to those from Ariño, the palaeodiversity described as inclusions from the Ariño amber  
721 is one order of magnitude higher, with the fossiliferous potential of the amber  
722 probably being significantly greater as well (**Tanke, 2004; Currie et al., 2008; Nel et**  
723 **al., 2010; DePalma, 2010; Cockx et al., 2020**). Indeed, the aerial amber from Ariño  
724 stands out for being unusually highly fossiliferous and has already revealed a  
725 remarkable diversity in spite of the early stages of its study, including morphotypes  
726 that will be described as new taxa. Furthermore, Ariño is the first known locality  
727 yielding fossiliferous amber and dinosaur remains in which both elements and the  
728 remaining palaeontological assemblage assessed –except some pollen and plant  
729 macroremains– generally suffered no or low-grade transport prior to burial  
730 (autochthony/parautochthony), and from which amber strictly in situ has been  
731 reported for the first time. This has enabled a reliable palaeoecological reconstruction  
732 and, more importantly, will keep allowing the extraction of sound palaeoecological  
733 inferences from upcoming material. Last but not least, Ariño is the oldest known  
734 locality preserving fossiliferous amber in a dinosaur bonebed –the only one hitherto  
735 described from the Early Cretaceous–, and it also provides the oldest fossiliferous  
736 amber from the Iberian Peninsula. All these characteristics render Ariño one of a  
737 kind, offering one of the most complete and integrated pictures from an ancient  
738 coastal ecosystem through two diverse and complementary taphonomic windows.  
739 This unique ‘dual’ site will remain of interest across many palaeobiological  
740 disciplines, and will be of particular significance at promoting studies in emerging  
741 fields such as deep-time arthropod-vertebrate interactions.

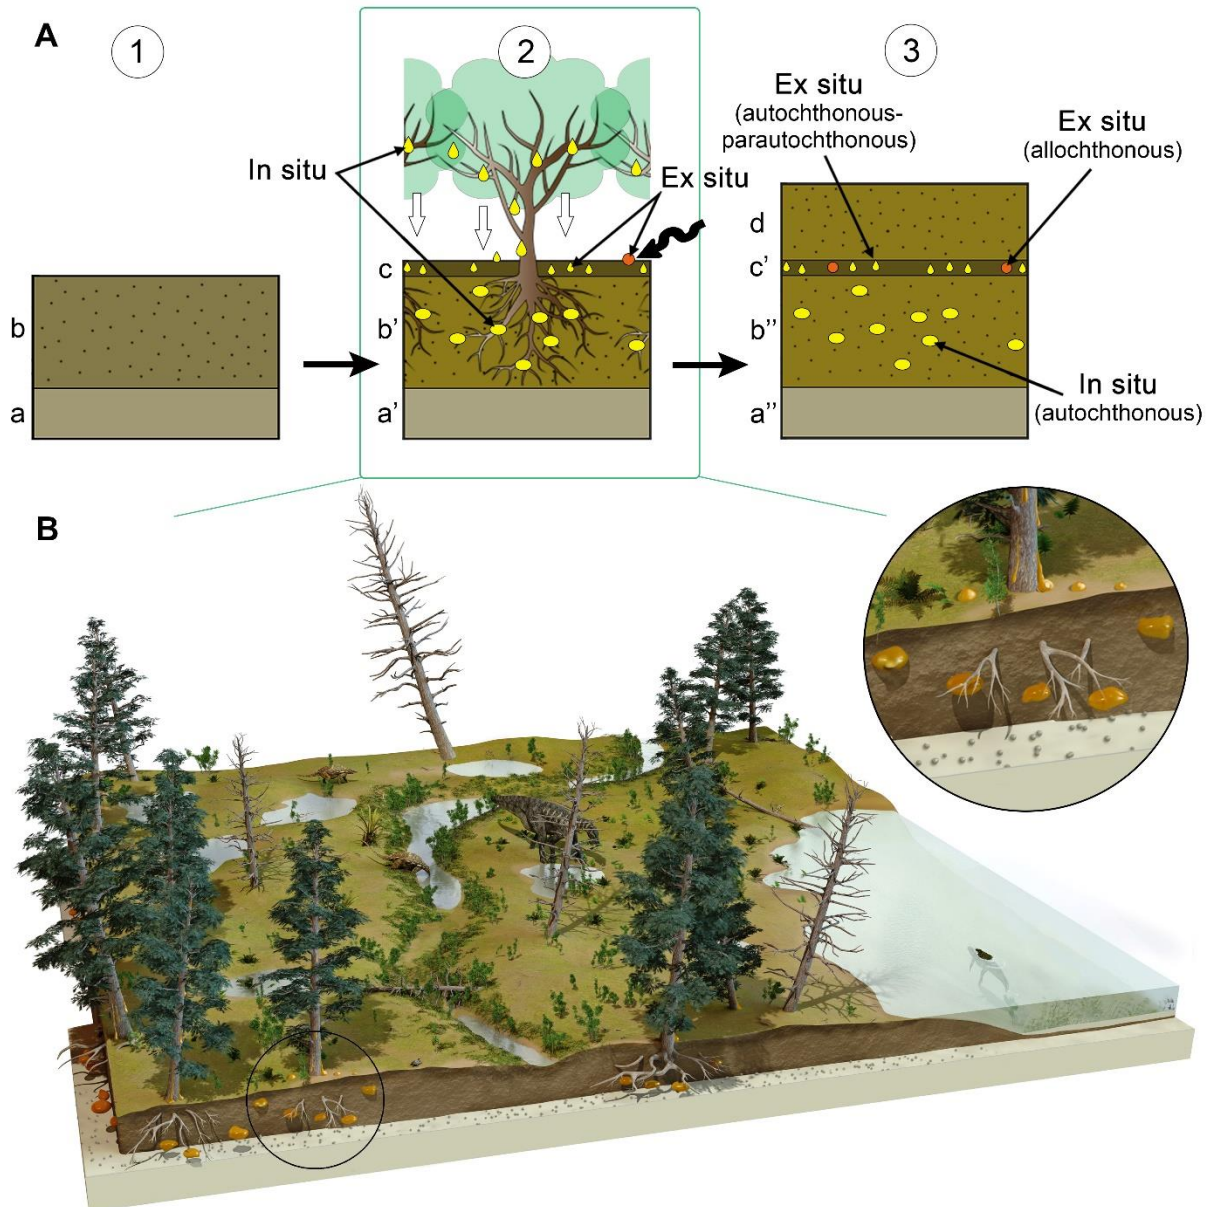

742

743 **Figure 6.** Formation of the amber deposit of Ariño. (A) Idealised diagrams depicting  
744 (1) the original depositional environment (a, carbonates; b, soil prior to tree  
745 installation); (2) resiniferous forest installation and pedogenesis; concentration of in  
746 situ kidney-shaped resin pieces produced by the roots in a root horizon (b');  
747 accumulation of aerial resin pieces fallen by gravity from the branches and trunk and  
748 a few resin pieces dragged after transport (wavy arrow) in a litter horizon (c); and (3)  
749 fossildiagenesis of the resin pieces, resulting in a layer containing strictly in situ  
750 autochthonous kidney-shaped amber pieces produced by roots (b''), and a layer

751 mostly composed of strictly ex situ autochthonous-parautochthonous aerial amber  
752 pieces and a few potentially allochthonous amber pieces (c'); the level AR-1  
753 corresponds to a single cycle of forest floor installation-destruction. (B) Artistic  
754 reconstruction of the coastal freshwater swamp ecosystem of Ariño, with emphasis  
755 on the depositional environment of the resin. The resiniferous trees are  
756 araucariaceans (extant model used: *Agathis australis*), tentatively identified as the  
757 resin source of Ariño; other depicted terrestrial plants are undetermined vegetation  
758 included for artistic purpose. Charophytes and a crocodile (*Hulkepholis plotos*)  
759 inhabit the shallow water body on the right; two nodosaurids (*Europelta carbonensis*),  
760 an iguanodontian (*Proa valdearinnensis*), and a turtle (*Aragochersis lignitesta*) are  
761 shown on land; these vertebrate species were erected based on the Ariño bonebed  
762 material. Artist of the illustration in (B): José Antonio Peñas.

763

## 764 **Materials and methods**

765

### 766 **Fieldwork and material**

767 Amber samples were collected from the level AR-1 of the Ariño outcrop in the Santa  
768 María open-pit coal mine, near Ariño village (Teruel Province, Aragón, Spain). The  
769 amber excavation was carried out in July 2019, after two previous palaeontological  
770 amber surveys in July 2018 and May 2019 (permissions 201/10-2018 and 201/10-  
771 2019 of the Aragon Government, Spain). Excavation of aerial amber pieces was  
772 carried out at two locations from the AR-1 level (**Figure 1C**), near the AR-1/154, AR-  
773 1/156, AR-1/157, and AR-1/158 vertebrate concentrations. The acronyms of the  
774 amber pieces and bioinclusions are AR-1-A-(number). Field observations on copal  
775 associated with *Agathis australis*, herein used for comparison, were conducted at a

776 private propriety in Waipapakauri, close to State Highway 1, North Island of New  
777 Zealand, by EP and XD, during a campaign in 2011 and with the permission of the  
778 landowner. Macrophotographs of the Ariño site and material were made using a  
779 Canon EOS70D.

780

### 781 **Amber preparation and imaging**

782 Most of the amber pieces with bioinclusions were embedded in epoxy resin (Epo-tek  
783 301) following **Corral et al. (1999)** to facilitate their preservation and observation.  
784 Several amber pieces were cut to observe the fluid inclusions and mineralisations.  
785 The amber piece AR-1-A-2019.129 was imaged and analysed with a SEM JEOL  
786 6010 PLUS/LA 20 kV with RX (EDS) detector at the Instituto Geológico y Minero de  
787 España laboratories (Tres Cantos, Spain). The sample AR-1-A-2018.1 of amber-  
788 infilled plant tissue was cleaved in several fragments and thin sections were made to  
789 obtain both longitudinal and transversal views of the cellular structure; other non-  
790 prepared samples were examined with a Leica Wild M3Z stereozoom microscope,  
791 equipped with a x2 frontal lens and a 0.5 to 40 zoom, under tangential light.  
792 Microphotographs of the amber inclusions and thin sections of amber-filled plant  
793 tissue were made with a sCMEX20 digital camera attached to an Olympus CX41  
794 compound microscope taken through ImageFocusAlpha version  
795 1.3.7.12967.20180920; images were processed using Photoshop CS6; fine black  
796 lines in figures indicate composition of photographs; **Figure 4C,E,F—figure**  
797 **supplement 1A,G,H** are formed by stacking. SEM images of amber-infilled plant  
798 tissue preserving the cellular structure and charcoalfied wood were obtained with a  
799 Quanta 200 electronic microscope at the Museo Nacional de Ciencias Naturales  
800 (Madrid, Spain). SEM imaging of the amber pieces with taphonomic importance was

801 carried out with a Quanta 200 electronic microscope at the Scanning Electron  
802 Microscopy Unit of the CCI TUB (Universitat de Barcelona); all pieces, except AR-1-A-  
803 2019.79, were sputtered with graphite. The amber piece AR-1-A-2019.79 was first  
804 submerged in a 50% dissolution of 37% HCl for two minutes and then in distilled  
805 water for one day to remove calcium carbonate and gypsum, respectively, from the  
806 surface of the piece. The amber piece AR-1-A-2019.93 was carefully unearthed in  
807 the field, although a small protruding fragment around 3 cm long was detached. The  
808 amber piece and the small fragment were protected to avoid friction on their surface  
809 during extraction, transport, and handling. Both were submerged in distilled water for  
810 one day. The small fragment was treated with four ultrasonic cleaning cycles of 30 s  
811 each; it was placed in a plastic pocket bag with distilled water to avoid friction on its  
812 surface. This methodology allows an accurate visualisation of its unaltered surface at  
813 the SEM to check if it suffered abrasion.

814

### 815 **Amber characterisation**

816 The FTIR (Fourier Transform Infrared Spectroscopy) analyses of the Ariño and San  
817 Just ambers were conducted using an IR PerkinElmer Frontier spectrometer that  
818 utilises a diamond ATR system with a temperature stabilised DTGS detector and a  
819 CsI beam splitter at the Molecular Spectrometry Unit of the CCI TUB. The study of  
820 molecular composition and chemotaxonomy was performed after extraction with  
821  $\text{CH}_2\text{Cl}_2:\text{CH}_3\text{OH}$  (DCM:MeOH 2:1) in a Soxhlet extractor of 2.3858 g of crushed  
822 stalactite-type aerial amber pieces, selected for showing the highest transparency  
823 and the least possible weathering and inclusion content. After extraction, 1.6126 g of  
824 polymeric, organic-insoluble material remained. The crude extract was directly  
825 analysed by gas chromatography-mass spectrometry (GC-MS), concentrated to 5 ml



826 at a rotovap, and fractionated using a silica gel column chromatography. Successive  
827 elution was performed using n-hexane, n-hexane:DCM 3:1 (fraction 1), DCM (fraction  
828 2) and methanol (fraction 3). Fraction 1 contained the aliphatic and tetralin-rich  
829 fraction and fraction 2 contained the aromatic fraction, both being analysed by GC-  
830 MS after concentration to 1 ml by evaporation in a nitrogen stream. Fraction 3 was  
831 dried, forming a creamy white pulverulent residue containing polar terpenoids and  
832 resin acids, analysed after conversion to trimethylsilyl derivatives by reaction with  
833 N,O-bis-(trimethylsilyl)trifluoroacetamide containing 1% trimethylchlorosilane at 65°C  
834 for 3 h. GC-MS analyses were performed with an Agilent 6850 GC coupled to an  
835 Agilent 5975C quadrupole mass spectrometer. Separation was performed on a HP-  
836 5MS column coated with (5%-phenyl)-methylpolysiloxane (30 m long, 0.25 mm inner  
837 diameter, 0.25 µm film thickness). The operating conditions were as follows: 8 psi He  
838 carrier gas pressure, initial temperature hold at 40°C for 1.5 min, increased from 40  
839 to 150°C at a rate of 15°C/min, hold for 2 min, increased from 150 to 255°C at a rate  
840 of 5°C/min, hold isothermal for 20 min, and finally increased to 300°C at a rate of  
841 5°C/min. The sample was injected in the split mode at 50:1 with the injector  
842 temperature at 290°C. The mass spectrometer was operated in the electron impact  
843 mode at an ionisation energy of 70 eV and scanned from 40 to 700 Da. The  
844 temperature of the ion source was 230°C and the quadrupole temperature was  
845 150°C. Data were acquired and processed using the Agilent MassHunter software,  
846 and percentages were calculated by normalising the peak areas of the corresponding  
847 compounds in the total extracts. Identification of compounds was based on authentic  
848 standards and comparison of mass spectra with standard libraries and literature.

849

850 **Charophytes and ostracods**

851 They were obtained from the level AR-1 after picking the rock associated with the  
852 amber. The acronyms of the charophytes and ostracods are AR-1-CH-(number) and  
853 AR-1-OS-(number), respectively. The microfossil preparation followed standard  
854 methods in micropalaeontology as applied to charophytes (*Pérez-Cano et al., 2020*).  
855 Scanning Electron Microscope (SEM) images of selected charophyte and ostracod  
856 specimens were obtained using the Quanta 200 scanning electron microscope at the  
857 Scanning Electron Microscopy Unit of the CCiTUB. Additional SEM images of  
858 ostracods were obtained using a JEOL 6400 device at the Faculty of Earth Sciences,  
859 Geography and Astronomy, University of Vienna (Austria). Clavatoracean utricular  
860 nomenclature follows that of *Grambast (1968)*.

861

## 862 **Palynology**

863 Four consecutive samples from the level AR-1 (ARN-01–ARN-04) were prepared for  
864 palynological studies by the Geologischer Dienst NRW (Germany) ([www.gd.nrw.de](http://www.gd.nrw.de)).  
865 ARN-01 and ARN-02 were obtained from the lower (root) layer rich in kidney-shaped  
866 amber pieces (ARN-02 closer to the upper layer), and ARN-03 and ARN-04 were  
867 gathered from the upper (litter) layer rich in aerial amber pieces (*Figure 1B*). The  
868 rock samples were treated following standard palynological preparation techniques  
869 (*Traverse, 2007*) consisting of acid attack with HCl, HF, and diluted HNO<sub>3</sub> and  
870 sieving with different grid sizes (500, 250, 75, 50, and 12 µm). Samples were studied  
871 with an Olympus BX51 brightfield light microscope attached to a ColorView IIIu  
872 camera. The percentage ranges provided in the results show the lowest and the  
873 highest abundance of the corresponding taxon in the four samples.

874

## 875 **Material availability**

876 All the material obtained prior and during the amber excavation in Ariño is housed at  
877 the Museo Aragonés de Paleontología (Fundación Conjunto Paleontológico de  
878 Teruel-Dinópolis, Teruel Province, Spain).

879 The copal pieces for comparison are housed at the Museo Geominero of the  
880 Instituto Geológico y Minero de España (IGME) and Universitat de Barcelona (UB).

881

## 882 **Acknowledgements**

883 We are grateful to the SAMCA Group for its collaboration. We thank the permissions  
884 of the Dirección General de Patrimonio Cultural del Gobierno de Aragón (Spain) to  
885 excavate. We thank Alejandro Gallardo (Laboratory of Palaeontology-UB), Telm  
886 Bover-Arnal (UB), Guillermo Rey, José Antonio Peñas, and the technicians of the  
887 CCIUB. Equipment has been partly funded by FEDER (IGME13-4E-1518). We are  
888 grateful to the Departamento de Ciencia, Innovación y Sociedad del Conocimiento,  
889 Gobierno de Aragón (Grupo de Investigación de Referencia E04\_20R) y Ministerio  
890 de Ciencia e Innovación, Gobierno de España (Unidad de Paleontología de  
891 Dinosaurios de Teruel and AMBERIA Team). This study is a contribution to the  
892 projects CRE CGL2017-84419, PGC2018-094034-B-C22 (both from the Ministerio  
893 de Ciencia, Innovación y Universidades, Spain, AEI/FEDER, UE), BIOGEOEVENTS  
894 CGL2015-69805-P (Ministerio de Economía y Competitividad, Spain, and the  
895 European Regional Development Fund), 2017SGR-824 (AGAUR, Generalitat de  
896 Catalunya, Spain), UNESCO IGCP Project 661 of the Austrian Academy of Sciences,  
897 and LR18 ES07 (Faculty of Sciences, Université de Tunis El Manar). J.P.-C.  
898 acknowledges the support from the Ministerio de Economía y Competitividad (BES-  
899 2016-076469). A.S.-G. is funded by an APOSTD2019 Research Fellowship  
900 (Generalitat Valenciana, Spain) and the European Social Fund. R.P.-d.I.F. is funded

901 by a Research Fellowship (Oxford University Museum of Natural History, UK). This  
902 study forms part of the first author's (S.Á.-P.) doctoral thesis, supported by a grant  
903 from the Secretaria d'Universitats i Recerca de la Generalitat de Catalunya and the  
904 European Social Fund (2020FI\_B1 00002).

905

## 906 **Additional information**

907

### 908 **Funding**

909

| <b>Funder</b>                                                                                          | <b>Grant reference number</b> | <b>Author</b>                        |
|--------------------------------------------------------------------------------------------------------|-------------------------------|--------------------------------------|
| Ministerio de Ciencia,<br>Innovación y<br>Universidades (Spain)                                        | CGL2017-84419                 | Xavier Delclòs and<br>Eduardo Barrón |
| Ministerio de Ciencia,<br>Innovación y<br>Universidades (Spain)                                        | PGC2018-094034-B-C22          | Luis Alcalá                          |
| Ministerio de Economía y<br>Competitividad (Spain)<br>and the European<br>Regional Development<br>Fund | CGL2015-69805-P               | Carles Martín-Closas                 |
| AGAUR, Generalitat de<br>Catalunya (Spain)                                                             | 2017SGR-824                   | Xavier Delclòs                       |
| Secretaria d'Universitats i<br>Recerca de la Generalitat                                               | 2020FI_B1 00002               | Sergio Álvarez-Parra                 |

|                                                                                  |                 |                            |
|----------------------------------------------------------------------------------|-----------------|----------------------------|
| de Catalunya and the European Social Fund                                        |                 |                            |
| Research Fellowship (Oxford University Museum of Natural History, UK)            |                 | Ricardo Pérez-de la Fuente |
| Ministerio de Economía y Competitividad (Spain)                                  | BES-2016-076469 | Jordi Pérez-Cano           |
| UNESCO IGCP of the Austrian Academy of Sciences (Austria)                        | Project 661     | Khaled Trabelsi            |
| Research fellowship (Faculty of Sciences, Université de Tunis El Manar, Tunisia) | LR18 ES07       | Khaled Trabelsi            |
| Generalitat Valenciana (Spain)                                                   | APOSTD2019      | Alba Sánchez-García        |
| European Regional Development Fund                                               | IGME13-4E-1518  | Rafael P Lozano            |

910

911 The funders had no role in study design, data collection and interpretation, or the  
 912 decision to submit the work for publication.

913

914 **Author contributions**

915 Sergio Álvarez-Parra, Conceptualisation, Fieldwork, Investigation, Methodology,  
916 Supervision, Writing – original draft, Writing – review and editing; Ricardo Pérez-de la  
917 Fuente, Conceptualisation, Fieldwork, Investigation, Writing – original draft, Writing –  
918 review and editing; Enrique Peñalver: Conceptualisation, Fieldwork, Investigation,  
919 Supervision, Writing – review and editing; Eduardo Barrón, Fieldwork, Investigation,  
920 Methodology, Project administration; Luis Alcalá, Fieldwork, Investigation, Project  
921 administration; Jordi Pérez-Cano, Investigation, Methodology; Carles Martín-Closas,  
922 Investigation, Methodology; Khaled Trabelsi, Investigation, Methodology; Nieves  
923 Meléndez, Fieldwork, Investigation, Methodology; Rafael López Del Valle, Fieldwork,  
924 Methodology; Rafael P Lozano, Fieldwork, Investigation, Methodology; David Peris,  
925 Fieldwork, Investigation; Ana Rodrigo, Fieldwork; Víctor Sarto i Monteys, Fieldwork;  
926 Carlos A Bueno-Cebollada, Investigation; César Menor-Salván, Investigation,  
927 Methodology; Marc Philippe, Investigation, Methodology; Alba Sánchez-García,  
928 Investigation; Constanza Peña-Kairath, Fieldwork; Antonio Arillo, Investigation;  
929 Eduardo Espílez, Fieldwork, Investigation; Luis Mampel, Fieldwork, Investigation;  
930 Xavier Delclòs, Conceptualisation, Fieldwork, Investigation, Project administration,  
931 Supervision, Writing – review and editing. All authors contributed to the discussion.

932

### 933 **Author ORCIDs**

934 Sergio Álvarez-Parra: <https://orcid.org/0000-0002-0232-1647>

935 Ricardo Pérez-de la Fuente: <https://orcid.org/0000-0002-2830-2639>

936 Enrique Peñalver: <https://orcid.org/0000-0001-8312-6087>

937 Eduardo Barrón: <https://orcid.org/0000-0003-4979-1117>

938 Luis Alcalá: <https://orcid.org/0000-0002-6369-6186>

939 Jordi Pérez-Cano: <https://orcid.org/0000-0002-1782-5346>

- 940 Carles Martín-Closas: <https://orcid.org/0000-0003-4349-738X>
- 941 Khaled Trabelsi: <https://orcid.org/0000-0003-0207-9819>
- 942 Nieves Meléndez: <https://orcid.org/0000-0002-9476-740X>
- 943 Rafael López Del Valle: <https://orcid.org/0000-0002-7164-9558>
- 944 Rafael P Lozano: <https://orcid.org/0000-0002-1022-3860>
- 945 David Peris: <https://orcid.org/0000-0003-4074-7400>
- 946 Ana Rodrigo: <https://orcid.org/0000-0001-7201-9286>
- 947 Víctor Sarto i Monteys: <https://orcid.org/0000-0003-2701-6558>
- 948 Carlos A Bueno-Cebollada: <https://orcid.org/0000-0003-0367-4177>
- 949 César Menor-Salván: <https://orcid.org/0000-0002-1238-190X>
- 950 Marc Philippe: <https://orcid.org/0000-0002-4658-617X>
- 951 Alba Sánchez-García: <https://orcid.org/0000-0003-0911-2001>
- 952 Constanza Peña-Kairath: <https://orcid.org/0000-0002-4877-7754>
- 953 Antonio Arillo: <https://orcid.org/0000-0002-4878-5797>
- 954 Eduardo Espílez: <https://orcid.org/0000-0002-9794-1776>
- 955 Luis Mampel: <https://orcid.org/0000-0002-0329-7319>
- 956 Xavier Delclòs: <https://orcid.org/0000-0002-2233-5480>

957

### 958 **Declaration of interests**

959 The authors declare no competing interests.

960

### 961 **Additional files**

962

### 963 **Supplementary files**

964

965 **Supplementary Video 1.** Amber excavation in the lower Albian bonebed level AR-1  
966 of Ariño during May 2019 and extraction of two strictly in situ (autochthonous) kidney-  
967 shaped amber pieces from the root layer. See also **Figures 1 and 2.**

968

969 **Supplementary Table 1. List of palynomorphs recorded from the lower Albian**  
970 **bonebed level AR-1 of Ariño and their relative abundances.** ARN-01 and ARN-02  
971 were obtained from the lower root layer with kidney-shaped amber pieces, and ARN-  
972 03 and ARN-04 from the upper litter layer rich in aerial amber pieces, all of them  
973 within the level AR-1. See also **Figure 5—figure supplement 1.**

974

975 **Figure 3—source data 1.** FTIR data of the Ariño amber 1.

976

977 **Figure 3—source data 2.** FTIR data of the Ariño amber 2.

978

979 **Figure 3—source data 3.** FTIR data of the San Just amber.

980

981 **Figure 3—source data 4.** GC-MS data of the Ariño amber.

982



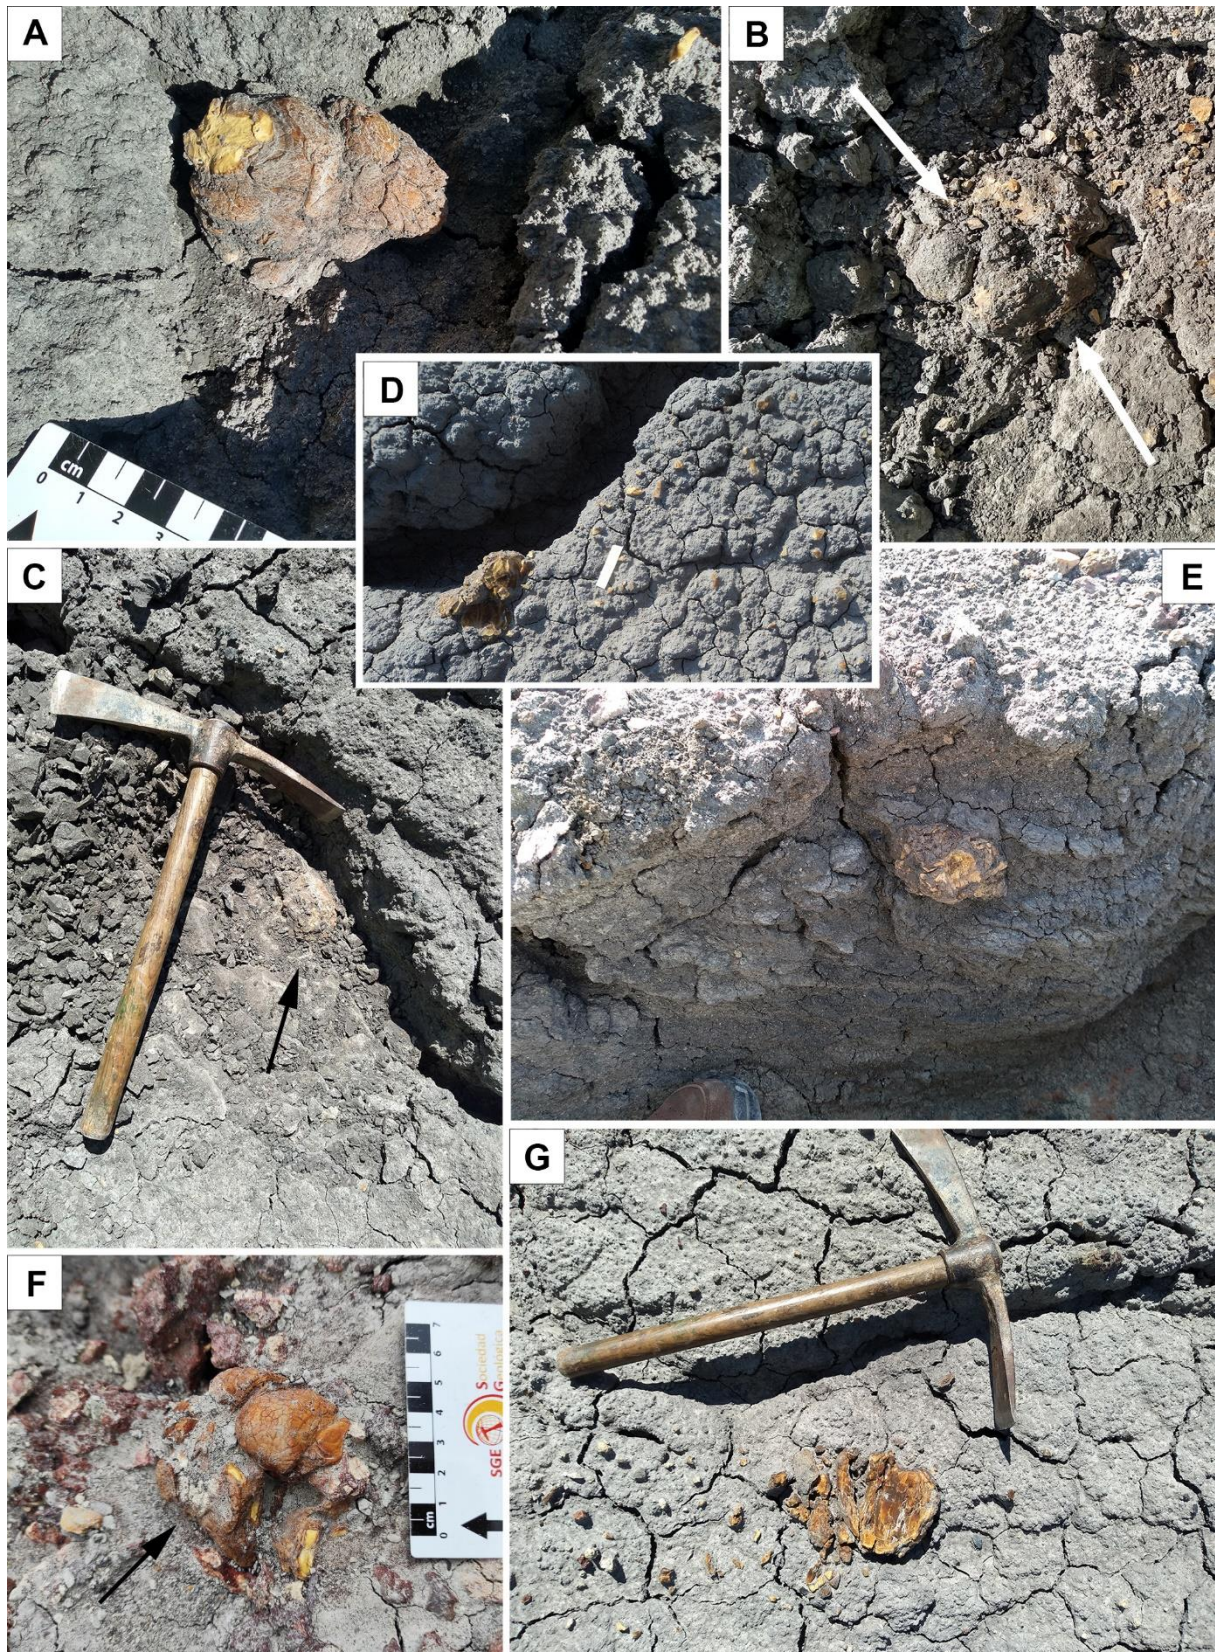

983

984 **Figure 2—figure supplement 1.** Strictly in situ (autochthonous) kidney-shaped

985 amber pieces from the root layer of the lower Albian bonebed level AR-1 of Ariño. (A)

986 Slightly elongate piece exposed by the weathering, but not moved, lacking a  
987 detached small surface fragment (left). **(B, C)** Two rounded and slightly elongate  
988 pieces (white arrows in (B) and black arrow in (C)) partially exposed during  
989 excavation (piece diameter in (B) = 9 cm; pickaxe length in (C) = 35 cm). **(D)** Strictly  
990 in situ piece fragmented by the weathering, and fragments of another piece on the  
991 right (paper strip = 4 cm). **(E)** Piece partially exposed in the sidewall of a small gully  
992 excavated by rain (piece diameter = ca. 7.5 cm). **(F)** Irregular in situ piece indicated  
993 with an arrow; centimetric scale. **(G)** Crumbled amber piece (pickaxe length = 35  
994 cm). (D, E) excavated during July 2018 and the rest during May 2019.

995

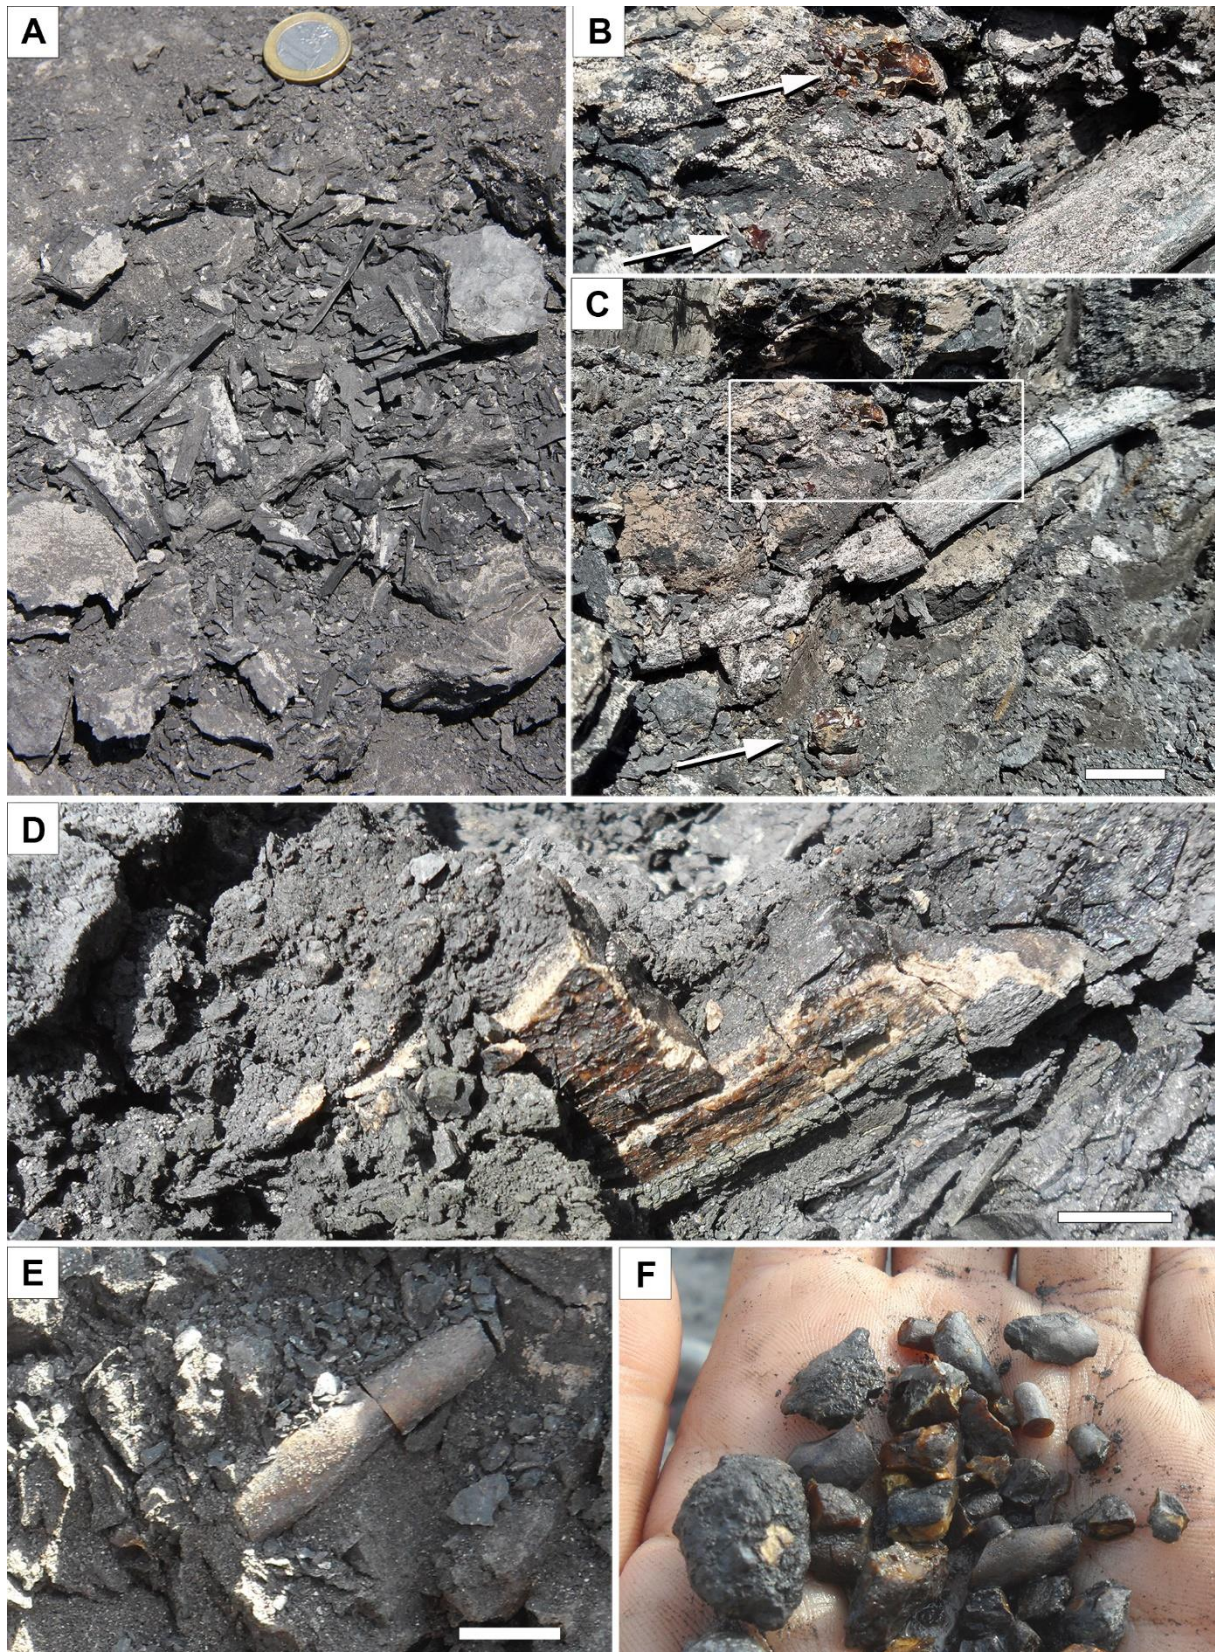

996

997 **Figure 2—figure supplement 2.** Litter layer of the lower Albian bonebed level AR-1

998 of Ariño. (A) Plant remains, most likely elongate charcoalified wood pieces (coin

999 diameter = 2.3 cm). **(B, C)** Strictly ex situ (autochthonous) aerial amber pieces  
1000 (arrows) and elongate woody remains ((B) is the enlarged inset in (C)). **(D)** Strictly ex  
1001 situ flattened amber piece most likely originated from resin coating the trunk or  
1002 infilling a broken trunk. **(E)** Strictly ex situ stalactite-shaped aerial amber piece. **(F)**  
1003 Assortment of aerial amber piece fragments. **(A, D–F)** excavated during July 2019  
1004 and the rest during May 2019. Scale bars, 2 cm (C), and 1 cm (D, E).

1005

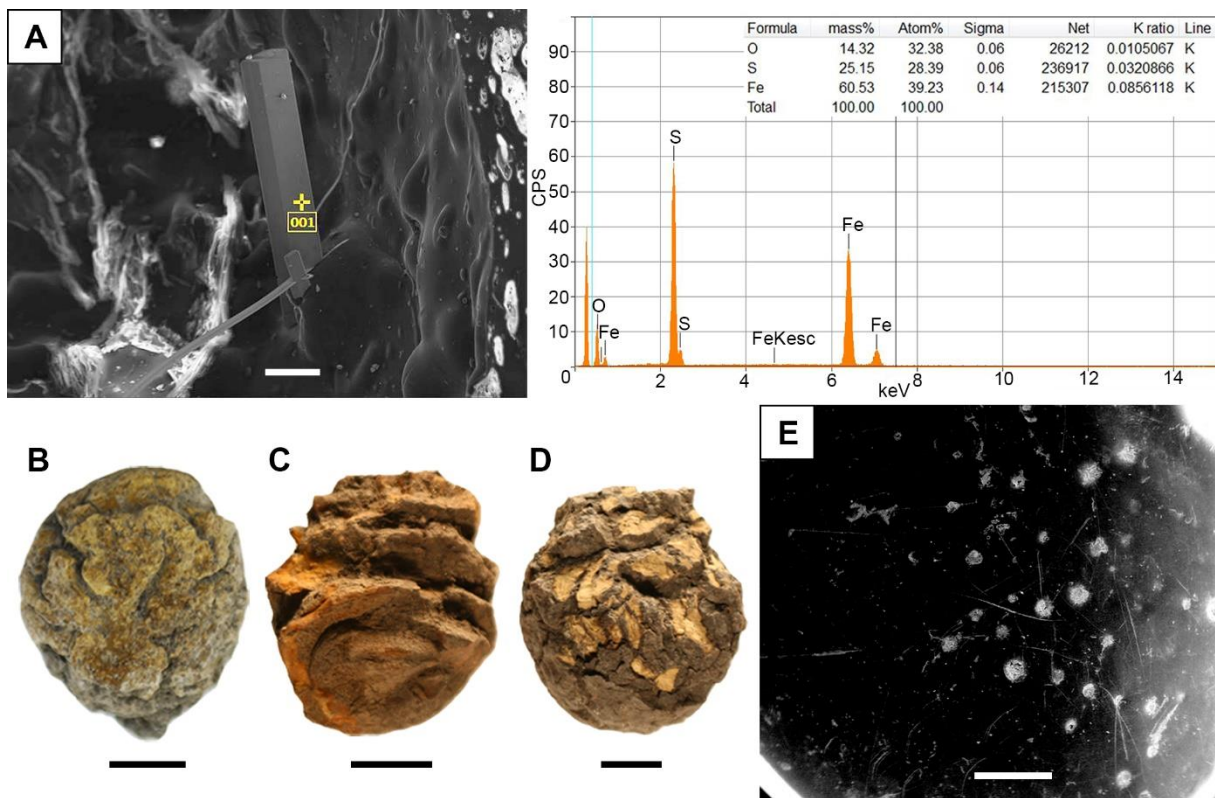

1006

1007 **Figure 2—figure supplement 3.** Amber pieces with taphonomic interest from the  
1008 level AR-1 of Ariño. **(A)** EDS analysis of the needle-shaped crystals from an iron  
1009 sulphate (likely szomolnokite) growing inward from the walls in the alleged empty  
1010 space left by a fluid bubble-like inclusion of an amber piece (AR-1-A-2019.129). **(B–**  
1011 **D)** Small, almost spherical amber masses from the litter layer (AR-1-A-2019.131, AR-  
1012 1-A-2019.132 and AR-1-A-2019.133, respectively). **(E)** Surface of a peculiar amber

1013 piece found in the litter layer, showing surface borings and linear grooves (AR-1-A-  
1014 2019.79). Scale bars, 0.1 mm (A), 5 mm (B), 1 cm (C, D), and 1 mm (E).  
1015

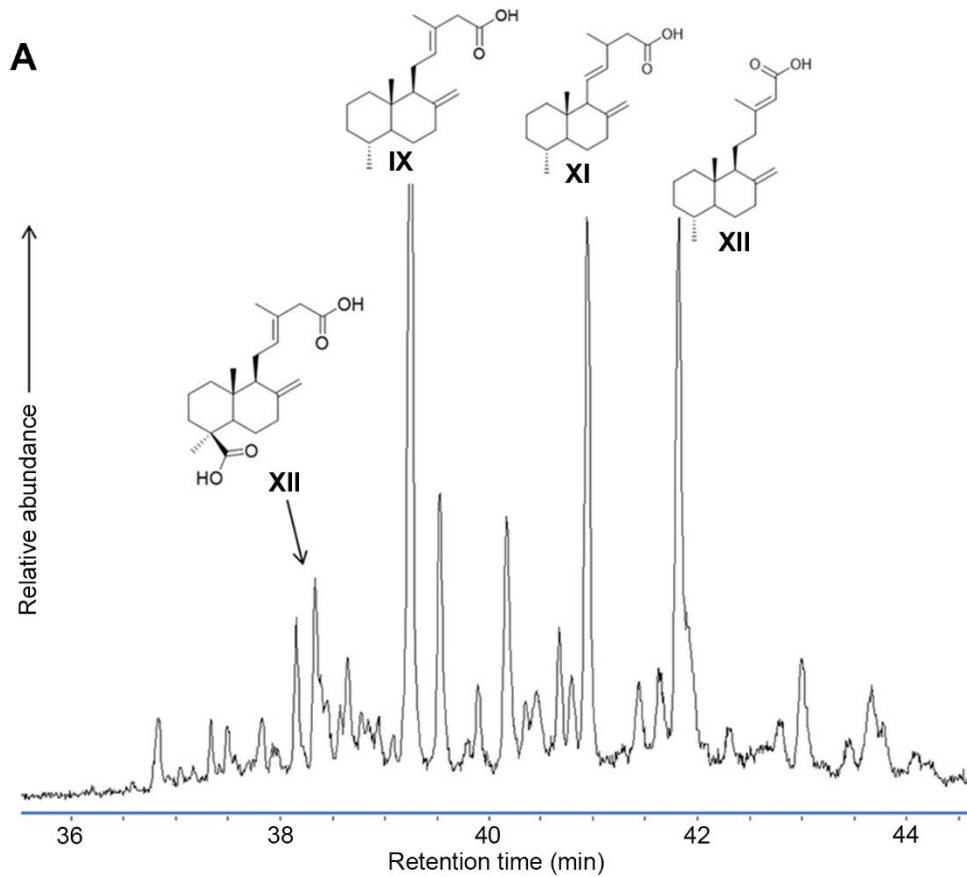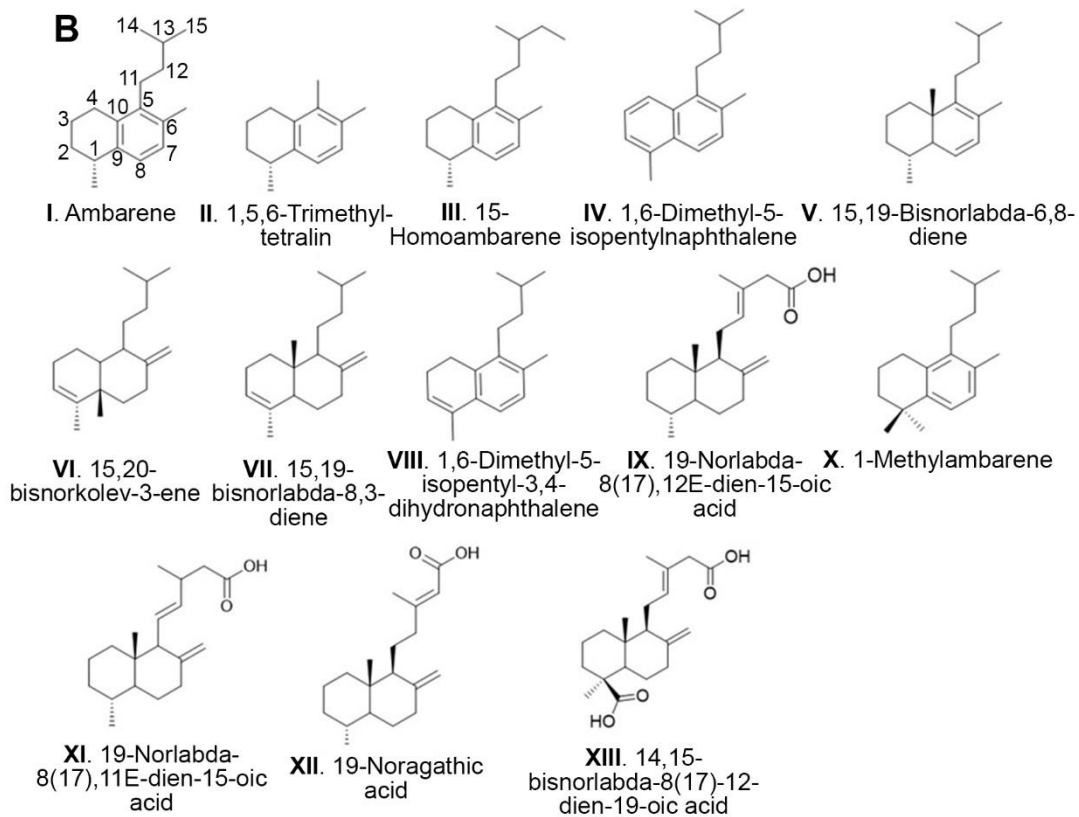

1017 **Figure 3—figure supplement 1.** Physicochemical characterisation of the Lower  
1018 Cretaceous amber from Ariño. **(A)** Gas chromatography-mass spectrometry (GC-MS)  
1019 chromatogram corresponding to the polar fraction of the organic extract of the Ariño  
1020 amber, showing labdanoic acids as main components; decarboxylation and  
1021 disproportionation of labdanoic acids lead to the main hydrocarbons found,  
1022 diterpenes of the labdane family. **(B)** Chemical structures cited in the work.  
1023

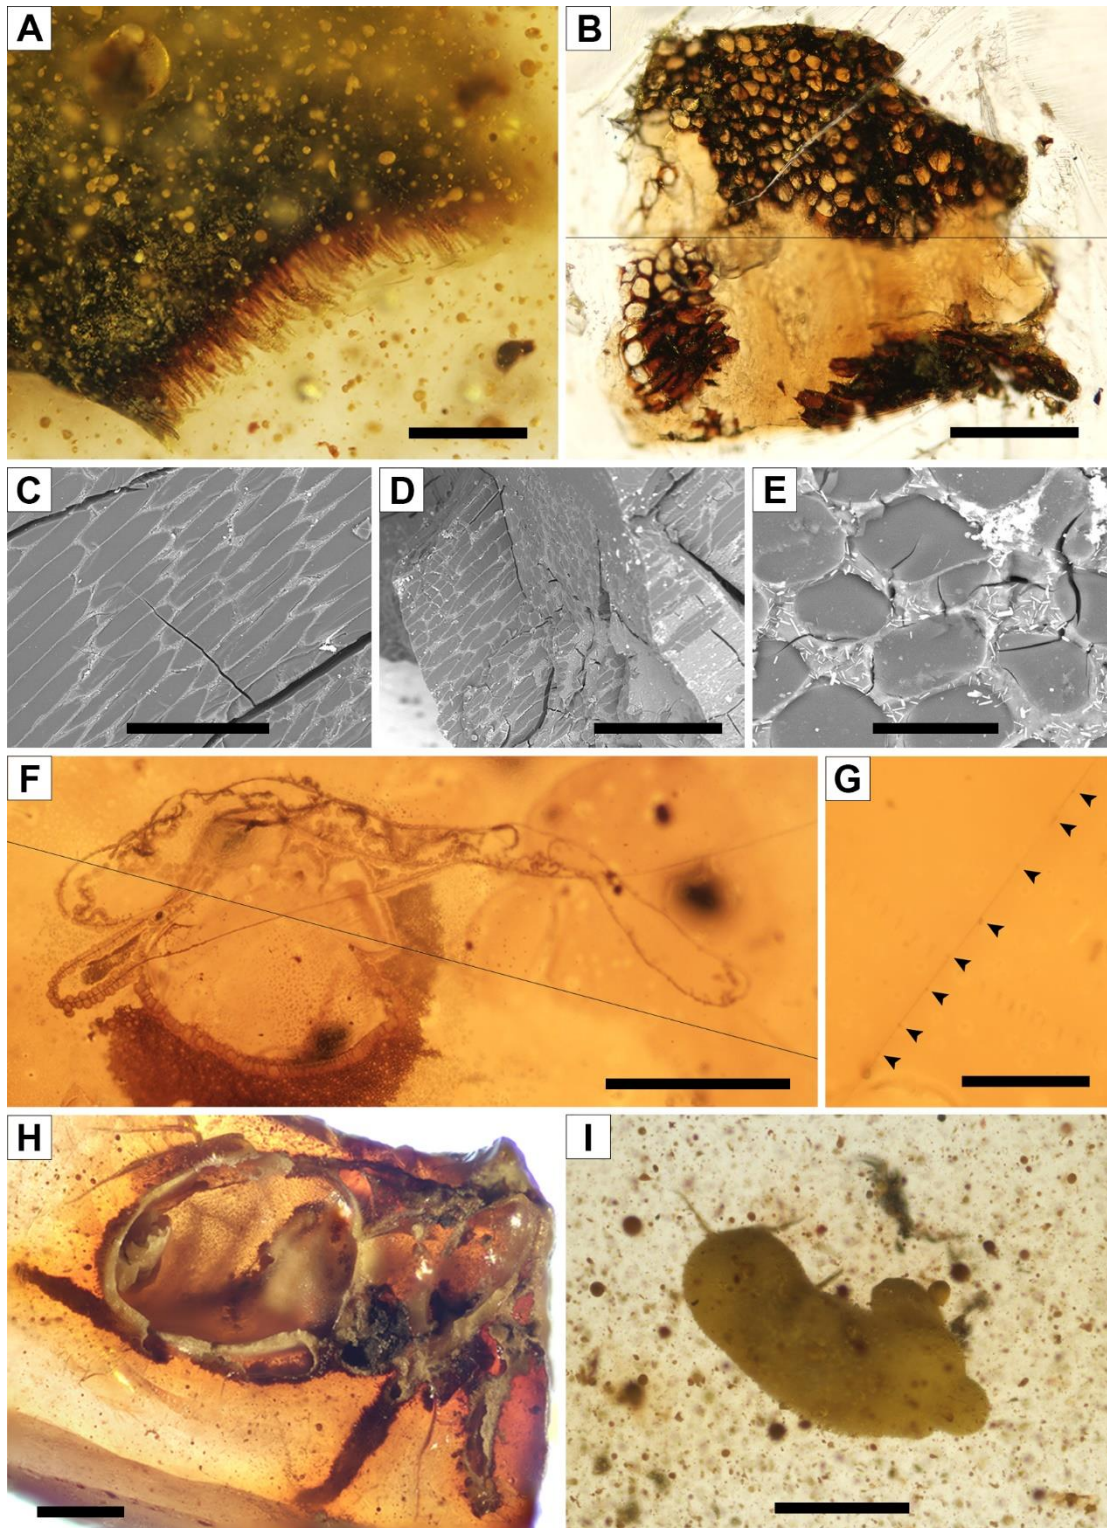

1024

1025 **Figure 4—figure supplement 1.** Diverse bioinclusions in amber from the level AR-1  
1026 of Ariño. (A) Plant remain (AR-1-A-2019.114.3). (B–E) Amber-infilled plant tissue  
1027 preserving the cellular structure that could correspond to suber (cork) (AR-1-A-  
1028 2018.1): (B) Preparation (transversal view); (C–E) SEM images: (C) in longitudinal



1029 and oblique view, **(D)** in transversal and oblique view, and **(E)** in transversal view. **(F)**  
1030 A tangled spiderweb portion (AR-1-A-2019.95.5). **(G)** Detail photograph of a  
1031 spiderweb strand found in the former, with glue droplets marked with arrowheads. **(H)**  
1032 Spider showing the inner body structure in the surface of a broken amber piece (AR-  
1033 1-A-2019.76). **(I)** Thrips showing a thin milky coat (AR-1-A-2019.114.1). Scale bars,  
1034 0.2 mm (A, C), 0.5 mm (B, F, H, I), 0.3 mm (D), 0.02 mm (E), and 0.05 mm (G).  
1035

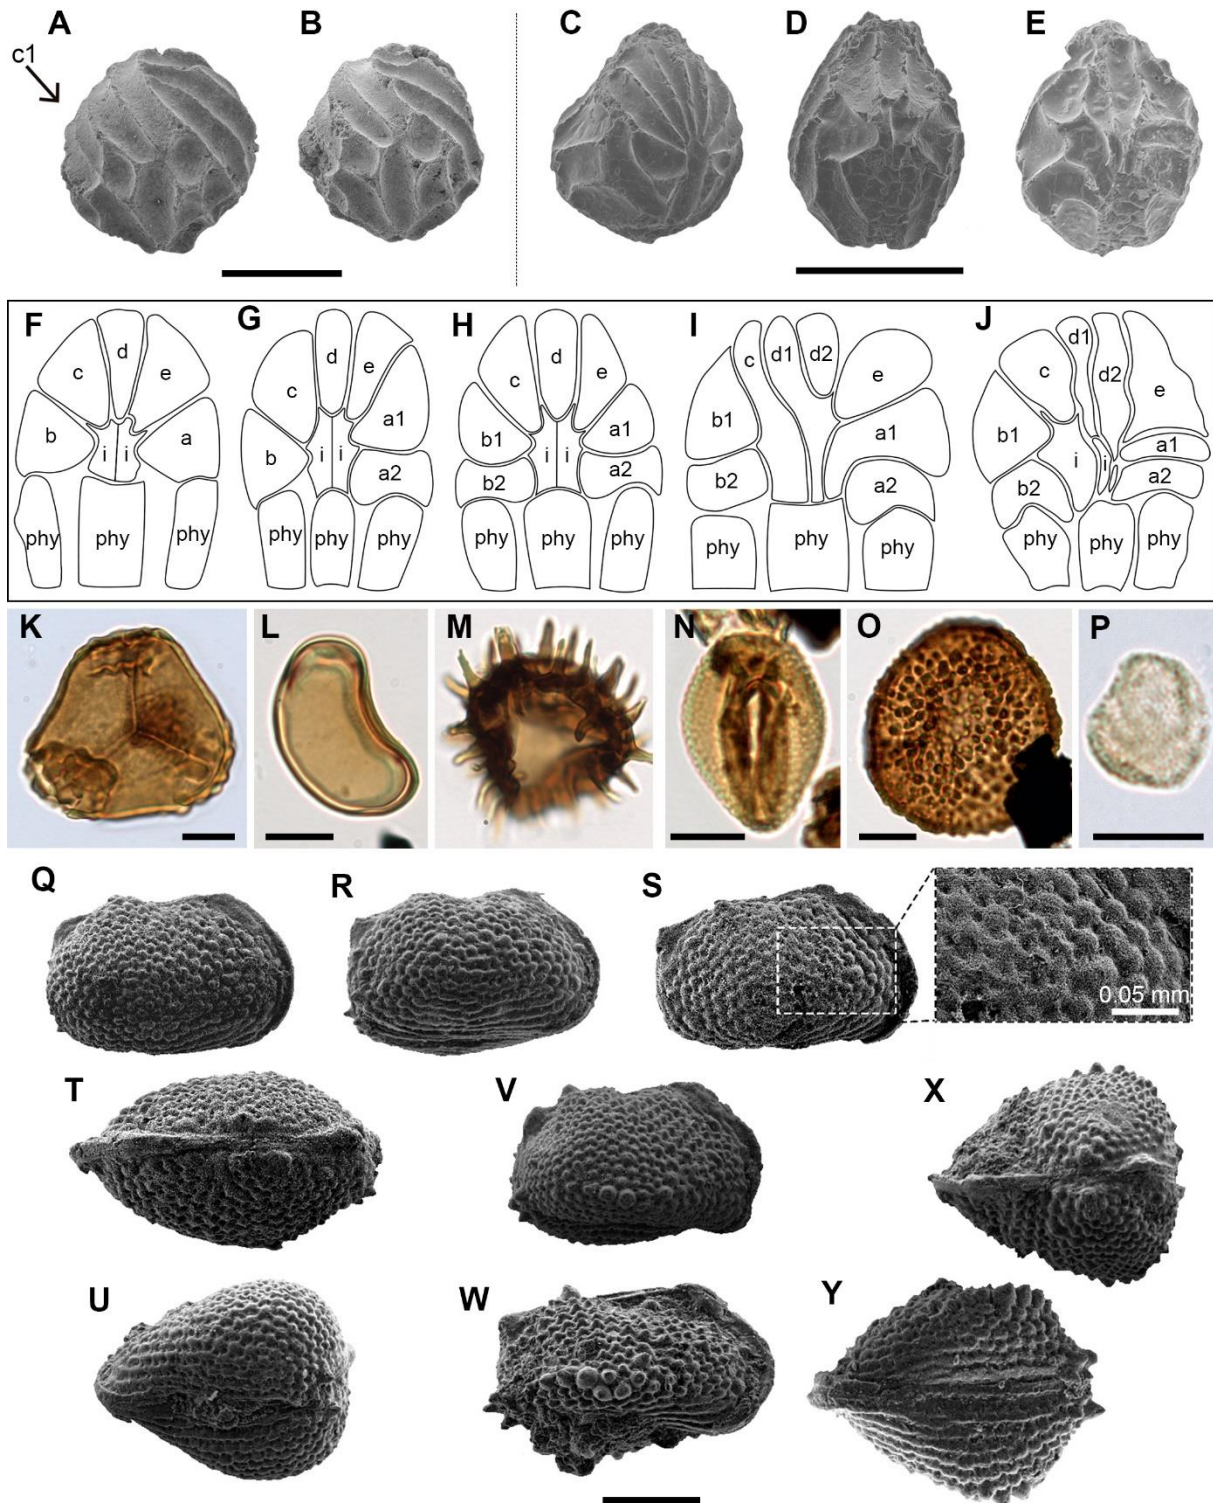

1036

1037 **Figure 5—figure supplement 1.** Additional charophyte (A–J), palynomorph (K–P),  
 1038 and ostracod (Q–Y) records sampled from level AR-1 of Ariño. (A, B) *Atopochara*  
 1039 *trivolvis* var. *trivolvis* (†Clavatoraceae) lateral views (AR-1-CH-003 and AR-1-CH-  
 1040 006, respectively); cell lettering after **Grambast (1968)**. (C–E) *Clavator harrisii* var.

1041 *harrisii* (†Clavatoraceae): **(C)** Lateral view (AR-1-CH-010); **(D)** Abaxial view  
1042 morphotype I (AR-1-CH-012); **(E)** Abaxial view morphotype V (AR-1-CH-016). **(F–J)**  
1043 Morphotypes of the abaxial part of the utricle of *Clavator harrisii* var. *harrisii*: **(F)**  
1044 Morphotype I showing the impression of the phylloid cortical cells (phy), two  
1045 intermediate cells (i) and an adaxial fan with five cells, two lateral cells (a and b) and  
1046 three apical cells (c, d, e); **(G)** Morphotype II showing the adaxial fan with six cells by  
1047 subdivision of the a cell; **(H)** Morphotype III showing the adaxial fan with seven cells  
1048 by subdivision of a and b cells; **(I)** Morphotype IV showing an adaxial fan with eight  
1049 cells by subdivision of d cell in addition to the other subdivisions already found in  
1050 morphotype II, fusion of fan cells and intermediate cells is also observed; **(J)**  
1051 Morphotype V with the same number of fan cells as in morphotype IV but showing  
1052 different cell shapes and no fusion between intermediate and fan cells. **(K)**  
1053 *Trilobosporites purverulentus* (ARN-02). **(L)** *Laevigatosporites haardti* (ARN-01). **(M)**  
1054 *Ceratosporites* sp. (ARN-02). **(N)** *Retimonocolpites dividuus* (ARN-03). **(O)**  
1055 *Foraminisporis* cf. *undulatus* (ARN-01). **(P)** *Tricolpites* sp. (ARN-04). **(Q–Y)**  
1056 *Rosacythere denticulata* (Limnocytheridae): **(Q–U)** Variant with well-developed  
1057 rosette ornamentation: **(Q–S)** Female carapaces, right lateral views and detail of the  
1058 ornamentation (AR-1-OS-008, AR-1-OS-009 and AR-1-OS-010, respectively); **(T)**  
1059 Male carapace, dorsal view (AR-1-OS-013); **(U)** Female carapace, ventral view (AR-  
1060 1-OS-014); **(V–Y)** Variant with well-developed rosette ornamentation and spine-like  
1061 node: **(V, W)** Female and male carapace respectively, right lateral views (AR-1-OS-  
1062 016 and AR-1-OS-017, respectively); **(X)** Female carapace, dorsal view (AR-1-OS-  
1063 019); **(Y)** Female carapace, ventral view (AR-1-OS-20). Scale bars, 0.05 mm (A–E),  
1064 0.01 mm (K–P), and 0.2 mm (Q–Y).

1065

1066 **Data availability**

1067 All data generated or analysed during this study are included in the manuscript and  
1068 supporting files. Palynomorphs taxa and their abundances are available in  
1069 **Supplementary Table 1**. Source data of FTIR analyses are available in **Figure 3—**  
1070 **source data 1–3**. Source data of GC-MS are available in **Figure 3—source data 4**.

1071

1072 **References**

1073

- 1074 Alcalá L, Espílez E, Mampel L, Kirkland JI, Ortiga M, Rubio D, González A, Ayala D,  
1075 Cobos A, Royo-Torres R, Gascó F, Pesquero MD. 2012. A new Lower Cretaceous  
1076 vertebrate bonebed near Ariño (Teruel, Aragón, Spain); found and managed in a  
1077 joint collaboration between a mining company and a palaeontological park.  
1078 *Geoheritage* **4**:275–286. DOI: <https://doi.org/10.1007/s12371-012-0068-y>
- 1079 Alcalá L, Espílez E, Mampel L. 2018. Ariño: La mina de los dinosaurios. In: Zamora S  
1080 (Ed), *Fósiles: Nuevos Hallazgos Paleontológicos en Aragón*. Zaragoza, Spain:  
1081 Institución «Fernando el Católico», pp. 111–141.
- 1082 Allison PA. 1990. Diagenesis. Pyrite. In: Briggs DEG, Crowther PR (Eds),  
1083 *Palaeobiology: A synthesis*. Hoboken, USA: Blackwell Science, pp. 253–255.
- 1084 Alonso J, Arillo A, Barrón E, Corral JC, Grimalt J, López JF, López R, Martínez-  
1085 Delclòs X, Ortuño V, Peñalver E, Trincão PR. 2000. A new fossil resin with  
1086 biological inclusions in Lower Cretaceous deposits from Álava (northern Spain,  
1087 Basque-Cantabrian Basin). *Journal of Paleontology* **74**:158–178. DOI:  
1088 <https://doi.org/10.1017/S0022336000031334>
- 1089 Álvarez-Parra S, Delclòs X, Solórzano-Kraemer MM, Alcalá L, Peñalver E. 2020a.  
1090 Cretaceous amniote integuments recorded through a taphonomic process unique

- 1091 to resins. *Scientific Reports* **10**:19840. DOI: <https://doi.org/10.1038/s41598-020->  
1092 76830-8
- 1093 Álvarez-Parra S, Peñalver E, Nel A, Delclòs X. 2020b. The oldest representative of  
1094 the extant barklice genus *Psyllipsocus* (Psocodea: Trogiomorpha: Psyllipsocidae)  
1095 from the Cenomanian amber of Myanmar. *Cretaceous Research* **113**:104480.  
1096 DOI: <https://doi.org/10.1016/j.cretres.2020.104480>
- 1097 Anderson JA, Anderson HM, Cleal CJ. 2007. *Brief History of the Gymnosperms:*  
1098 *Classification, Biodiversity, Phytogeography and Ecology*. Pretoria, South Africa:  
1099 South African National Biodiversity Institute.
- 1100 Arillo A, Blagoderov V, Peñalver E. 2018. Early Cretaceous parasitism in amber: A  
1101 new species of *Burmazelmira* fly (Diptera: Archizelmiridae) parasitized by a *Leptus*  
1102 sp. mite (Acari, Erythraeidae). *Cretaceous Research* **86**:24–32. DOI:  
1103 <https://doi.org/10.1016/j.cretres.2018.02.006>
- 1104 Bell PR, Currie PJ. 2016. A high-latitude dromaeosaurid, *Boreonykus certekorum*,  
1105 gen. et sp. nov. (Theropoda), from the upper Campanian Wapiti Formation, west-  
1106 central Alberta. *Journal of Vertebrate Paleontology* **36**:e1034359. DOI:  
1107 <https://doi.org/10.1080/02724634.2015.1034359>
- 1108 Bover-Arnal T, Moreno-Bedmar JA, Frijia G, Pascual-Cebrian E, Salas R. 2016.  
1109 Chronostratigraphy of the Barremian–Early Albian of the Maestrat Basin (E Iberian  
1110 Peninsula): integrating strontium-isotope stratigraphy and ammonoid  
1111 biostratigraphy. *Newsletters on Stratigraphy* **49**:41–68. DOI:  
1112 <https://doi.org/10.1127/nos/2016/0072>
- 1113 Burden ET, Hills LV. 1989. Illustrated key to genera of Lower Cretaceous terrestrial  
1114 palynomorphs (excluding megaspores) of Western Canada. *American Association*  
1115 *of Stratigraphic Palynologists Foundation, Contribution Series* **21**:1–147.

- 1116 Buscalioni ÁD, Alcalá L, Espílez E, Mampel L. 2013. European Goniopholididae from  
1117 the Early Albian Escucha Formation in Ariño (Teruel, Aragón, Spain). *Spanish*  
1118 *Journal of Palaeontology* **28**:103–122. DOI: <https://doi.org/10.7203/sjp.28.1.17835>
- 1119 Cervera A, Pardo G, Villena J. 1976. Algunas precisiones litoestratigráficas sobre la  
1120 formación ‘Lignitos de Escucha’. *Tecniterrae* **14**:25–33.
- 1121 Cockx P, McKellar R, Tappert R, Vavrek M, Muehlenbachs K. 2020. Bonebed amber  
1122 as a new source of paleontological data: The case of the Pipestone Creek deposit  
1123 (Upper Cretaceous), Alberta, Canada. *Gondwana Research* **81**:378–389. DOI:  
1124 <https://doi.org/10.1016/j.gr.2019.12.005>
- 1125 Cockx P, Tappert R, Muehlenbachs K, Somers C, McKellar R. 2021. Amber from a  
1126 *Tyrannosaurus rex* bonebed (Saskatchewan, Canada) with implications for  
1127 paleoenvironment and paleoecology. *Cretaceous Research* **125**:104865. DOI:  
1128 <https://doi.org/10.1016/j.cretres.2021.104865>
- 1129 Corral JC, López Del Valle R, Alonso J. 1999. El ámbar cretácico de Álava (Cuenca  
1130 Vasco-Cantábrica, norte de España). Su colecta y preparación. *Estudios del*  
1131 *Museo de Ciencias Naturales de Álava* **14**:7–21.
- 1132 Cox RE, Yamamoto S, Otto A, Simoneit BRT. 2007. Oxygenated di- and tricyclic  
1133 diterpenoids of southern hemisphere conifers. *Biochemical Systematics and*  
1134 *Ecology* **35**:342–362. DOI: <https://doi.org/10.1016/j.bse.2006.09.013>
- 1135 Currie PJ, Langston WJr, Tanke DH. 2008. *A New Horned Dinosaur from an Upper*  
1136 *Cretaceous Bonebed in Alberta*. Ottawa, Canada: NRC Research Press.
- 1137 Delclòs X, Arillo A, Peñalver E, Barrón E, Soriano C, López Del Valle R, Bernárdez,  
1138 E, Corral C, Ortuño VM. 2007. Fossiliferous amber deposits from the Cretaceous  
1139 (Albian) of Spain. *Comptes Rendus Palevol* **6**:135–149. DOI:  
1140 <https://doi.org/10.1016/j.crpv.2006.09.003>

- 1141 Delclòs X, Peñalver E, Ranaivosoa V, Solórzano-Kraemer MM. 2020. Unravelling the  
1142 mystery of “Madagascar copal”: Age, origin and preservation of a Recent resin.  
1143 *PLoS One* **15**:e0232623. DOI: <https://doi.org/10.1371/journal.pone.0232623>
- 1144 DePalma RA. 2010. *Geology, taphonomy, and paleoecology of a unique Upper*  
1145 *Cretaceous bonebed near the Cretaceous-Tertiary boundary in South Dakota*:  
1146 PhD Dissertation, University of Kansas.
- 1147 DePalma R, Cichocki F, Dierick M, Feeney R. 2010. Preliminary notes on the first  
1148 recorded amber insects from the Hell Creek Formation. *The Journal of*  
1149 *Paleontological Sciences*, C.10.0001.
- 1150 DePalma RA, Burnham DA, Martin LD, Larson PL, Bakker RT. 2015. The first giant  
1151 raptor (Theropoda: Dromaeosauridae) from the Hell Creek  
1152 Formation. *Paleontological Contributions* **14**:1–16. DOI:  
1153 <https://doi.org/10.17161/paleo.1808.18764>
- 1154 Doyle JA, Endress PK, Upchurch GR. 2008. Early Cretaceous monocots: a  
1155 phylogenetic evaluation. *Acta Musei Nationalis Pragae series B - Historia Naturalis*  
1156 **64**:59–87. DOI: <https://doi.org/10.5167/uzh-11654>
- 1157 Farjon A. 2005. *A monograph of Cupressaceae and Sciadopitys*. London, UK: Royal  
1158 Botanic Gardens.
- 1159 Foelix RF. 2011. *Biology of Spiders*. Oxford, UK: Oxford University Press.
- 1160 Girard V, Breton G, Perrichot V, Bilotte M, Le Loeuff J, Nel A, Philippe M, Thevenard  
1161 F. 2013. The Cenomanian amber of Fourtou (Aude, Southern France): Taphonomy  
1162 and palaeoecological implications. *Annales de Paléontologie* **99**:301–315. DOI:  
1163 <https://doi.org/10.1016/j.annpal.2013.06.002>
- 1164 Grambast L. 1968. Evolution of the utricle in the charophyta genera *Perimneste*  
1165 Harris and *Atopochara* Peck. *Journal of the Linnean Society (Botany)* **61**:5–11.

- 1166 Grimaldi DA, Engel MS, Nascimbene PC. 2002. Fossiliferous Cretaceous amber  
1167 from Myanmar (Burma): its rediscovery, biotic diversity, and paleontological  
1168 significance. *American Museum Novitates* **3361**:1–71. DOI:  
1169 [https://doi.org/10.1206/0003-0082\(2002\)361<0001:FCAFMB>2.0.CO;2](https://doi.org/10.1206/0003-0082(2002)361<0001:FCAFMB>2.0.CO;2)
- 1170 Grimalt JO, Simoneit BRT, Hatcher PG, Nissenbaum A. 1988. The molecular  
1171 composition of ambers. *Organic Geochemistry* **13**:677–690. DOI:  
1172 [https://doi.org/10.1016/0146-6380\(88\)90089-7](https://doi.org/10.1016/0146-6380(88)90089-7)
- 1173 Haug JT, Haug C. 2021. A 100 million-year-old armoured caterpillar supports the  
1174 early diversification of moths and butterflies. *Gondwana Research* **93**:101–105.  
1175 DOI: <https://doi.org/10.1016/j.gr.2021.01.009>
- 1176 Henwood A. 1993. Recent plant resins and the taphonomy of organisms in amber: a  
1177 review. *Modern Geology* **19**:35–59.
- 1178 Horne DJ. 2009. Purbeck–Wealden. In: Whittaker JE, Hart MB (Eds), *Ostracods in*  
1179 *British Stratigraphy*. London, UK: The Geological Society of London, pp. 289–308.
- 1180 Judson M, Wunderlich J. 2003. Rhagidiidae (Acari, Eupodoidea) from Baltic amber.  
1181 *Acta Zoologica Cracoviensia* **46**:147–152.
- 1182 Kawamura T, Koshino H, Nakamura T, Nagasawa Y, Nanao H, Shirai M, Uesugi S,  
1183 Ohno M, Kimura K. 2018. Amberene and 1-methylamberene, isolated and  
1184 identified from Kuji amber (Japan). *Organic Geochemistry* **120**:12–18. DOI:  
1185 <https://doi.org/10.1016/j.orggeochem.2018.02.014>
- 1186 Kirkland JI, Alcalá L, Loewen MA, Espílez E, Mampel L, Wiesma JP. 2013. The basal  
1187 nodosaurid ankylosaur *Europelta carbonensis* n. gen., n. sp. from the Lower  
1188 Cretaceous (Lower Albian) Escucha Formation of northeastern Spain. *PLoS One*  
1189 **8**:e80405. DOI: <https://doi.org/10.1371/journal.pone.0080405>



- 1190 Kvaček J, Barrón E, Heřmanová Z, Mendes MM, Karch J, Žemlička J, Dudák J. 2018.  
1191 Araucarian conifer from late Albian amber of northern Spain. *Papers in*  
1192 *Palaeontology* **4**:643–656. DOI: <https://doi.org/10.1002/spp2.1223>
- 1193 Langenheim JH. 1967. Preliminary investigations of *Hymenaea courbaril* as a resin  
1194 producer. *Journal of the Arnold Arboretum* **48**:203–230.
- 1195 Langenheim JH. 2003. *Plant Resins: Chemistry, Evolution, Ecology, and*  
1196 *Ethnobotany*. Portland, USA: Timber Press.
- 1197 Levings SC, Windsor DM. 1985. Litter arthropod populations in a tropical deciduous  
1198 forest: relationships between years and arthropod groups. *The Journal of Animal*  
1199 *Ecology* **54**:61–69. DOI: <https://doi.org/10.2307/4620>
- 1200 Lozano RP, Pérez-de la Fuente R, Barrón E, Rodrigo A, Viejo JL, Peñalver E. 2020.  
1201 Phloem sap in Cretaceous ambers as abundant double emulsions preserving  
1202 organic and inorganic residues. *Scientific Reports* **10**:9751. DOI:  
1203 <https://doi.org/10.1038/s41598-020-66631-4>
- 1204 Martín JH, Mifsud D, Rapisarda C. 2000. The whiteflies (Hemiptera: Aleyrodidae) of  
1205 Europe and the Mediterranean basin. *Bulletin Entomological Research* **90**:407–  
1206 448. DOI: <https://doi.org/10.1017/S0007485300000547>
- 1207 Martín-Closas C. 2000. *Els caròfits del Juràssic superior i Cretaci Inferior de la*  
1208 *Península Ibèrica*. Barcelona, Spain: Institut d'Estudis Catalans, Arxius de les  
1209 Seccions de Ciències, vol. 125.
- 1210 Martín-Closas C, Vicente A, Pérez-Cano J, Sanjuan J., Bover-Arnal, T. 2018. On the  
1211 earliest occurrence of *Tolypella* section *Tolypella* in the fossil record and the age  
1212 of major clades in extant Characeae. *Botany Letters* **165**:23–33. DOI:  
1213 <https://doi.org/10.1080/23818107.2017.1387078>

- 1214 Martínez-Delclòs X, Briggs DE, Peñalver E. 2004. Taphonomy of insects in  
1215 carbonates and amber. *Palaeogeography, Palaeoclimatology, Palaeoecology*  
1216 **203**:19–64. DOI: [https://doi.org/10.1016/S0031-0182\(03\)00643-6](https://doi.org/10.1016/S0031-0182(03)00643-6)
- 1217 McAlpine JF, Peterson BV, Shewell GE, Teskey HJ, Vockeroth JR, Wood DM. 1981.  
1218 Manual of Nearctic Diptera. Ottawa, Canada: Research Branch Agriculture  
1219 Canada.
- 1220 McDonald AT, Espílez E, Mampel L, Kirkland JI, Alcalá L. 2012. An unusual new  
1221 basal iguanodont (Dinosauria: Ornithopoda) from the Lower Cretaceous of Teruel,  
1222 Spain. *Zootaxa* **3595**:61–76. DOI: <https://doi.org/10.11646/zootaxa.3595.1.3>
- 1223 McKellar RC, Jones E, Engel MS, Tappert R, Wolfe AP, Muehlenbachs K, Cockx P,  
1224 Koppelhus EB, Currie, PJ. 2019. A direct association between amber and dinosaur  
1225 remains provides paleoecological insights. *Scientific Reports* **9**:17916. DOI:  
1226 <https://doi.org/10.1038/s41598-019-54400-x>
- 1227 Meléndez A, Soria AR, Meléndez N. 2000. A coastal lacustrine system in the Lower  
1228 Barremian from the Oliete Sub-basin, central Iberian Range, northeastern Spain.  
1229 In: Gierlowski-Kordesch EH, Kelts KR (Eds), *Lake Basins Through Space and*  
1230 *Time*. Tulsa, USA: The American Association of Petroleum Geologists, Studies in  
1231 Geology 46, pp. 279–284.
- 1232 Menor-Salván C, Simoneit BRT, Ruiz-Bermejo M, Alonso J. 2016. The molecular  
1233 composition of Cretaceous ambers: Identification and chemosystematic relevance  
1234 of 1,6-dimethyl-5-alkyltetralins and related bisnorlabdane biomarkers. *Organic*  
1235 *Geochemistry* **93**:7–21. DOI: <https://doi.org/10.1016/j.orggeochem.2015.12.010>
- 1236 Najarro M, Peñalver E, Rosales I, Pérez-de la Fuente R, Daviero-Gomez V, Gomez  
1237 B, Delclòs X. 2009. Unusual concentration of Early Albian arthropod-bearing  
1238 amber in the Basque-Cantabrian Basin (El Soplao, Cantabria, Northern Spain):

- 1239 palaeoenvironmental and palaeobiological implications. *Geologica Acta* **7**:363–  
1240 387. DOI: <https://doi.org/10.1344/105.000001443>
- 1241 Najarro M, Peñalver E, Pérez-de la Fuente R, Ortega-Blanco J, Menor-Salván C,  
1242 Barrón E, Soriano C, Rosales I, López Del Valle R, Velasco F, Tornos F, Daviero-  
1243 Gomez V, Gomez B, Delclòs X. 2010. Review of the El Soplao amber outcrop,  
1244 Early Cretaceous of Cantabria, Spain. *Acta Geologica Sinica (English Edition)*  
1245 **84**:959–976. DOI: <https://doi.org/10.1111/j.1755-6724.2010.00258.x>
- 1246 Nel A, DePalma RA, Engel MS. 2010. A possible hemiphlebiid damselfly in Late  
1247 Cretaceous amber from South Dakota (Odonata: Zygoptera). *Transactions of the*  
1248 *Kansas Academy of Science* **113**:231–234.
- 1249 Néraudeau D, Perrichot V, Dejux J, Masure E, Nel A, Phillippe M, Moreau P,  
1250 Guillocheau F, Guyot T. 2002. A new fossil locality with insects in amber and plants  
1251 (likely Uppermost Albian): Archingeay (Charente-Maritime, France). *Geobios*  
1252 **35**:233–240. DOI: [https://doi.org/10.1016/S0016-6995\(02\)00024-4](https://doi.org/10.1016/S0016-6995(02)00024-4)
- 1253 Néraudeau D, Allain R, Perrichot V, Videt B, de Lapparent de Broin F, Guillocheau F,  
1254 Philippe M, Rage J-C, Vullo, R. 2003. Découverte d'un dépôt paralique à bois  
1255 fossiles, ambre insectifère et restes d'Iguanodontidae (Dinosauria, Ornithopoda)  
1256 dans le Cénomanién inférieur de Fouras (Charente-Maritime, Sud-Ouest de la  
1257 France). *Comptes Rendus Palevol* **2**:221–230. DOI:  
1258 [https://doi.org/10.1016/S1631-0683\(03\)00032-0](https://doi.org/10.1016/S1631-0683(03)00032-0)
- 1259 Ortega-Blanco J, Peñalver E, Delclòs X, Engel MS. 2011. False fairy wasps in early  
1260 Cretaceous amber from Spain (Hymenoptera: Mymarommatoidea). *Palaeontology*  
1261 **54**:511–523. DOI: <https://doi.org/10.1111/j.1475-4983.2011.01049.x>

- 1262 Ortega-Blanco J, McKellar RC, Engel MS. 2014. Diverse scelionid wasps from Early  
1263 Cretaceous Álava amber, Spain (Hymenoptera: Platygastroidea). *Bulletin of*  
1264 *Geosciences* **89**:553–571. DOI: <https://doi.org/10.3140/bull.geosci.1463>
- 1265 Peñalver E, Delclòs X. 2010. Spanish amber. In: Penney D (Ed), *Biodiversity of*  
1266 *Fossils in Amber from the Major World Deposits*. Rochdale, UK: Siri Scientific  
1267 Press, pp. 236–270.
- 1268 Peñalver E, Delclòs X, Soriano C. 2007. A new rich amber outcrop with  
1269 palaeobiological inclusions in the Lower Cretaceous of Spain. *Cretaceous*  
1270 *Research* **28**:791–802. DOI: <https://doi.org/10.1016/j.cretres.2006.12.004>
- 1271 Peñalver E, González-Fernández B, López Del Valle R, Barrón E, Lozano RP,  
1272 Rodrigo A, Pérez-de la Fuente R, Menéndez-Casares E, Sarto i Monteys V. 2018.  
1273 Un nuevo yacimiento de ámbar cretácico en Asturias (norte de España):  
1274 Resultados preliminares de la excavación paleontológica de 2017 en La Rodada  
1275 (La Manjoya). In: Vaz N, Sá AA (Eds), *Yacimientos Paleontológicos*  
1276 *Excepcionales en la Península Ibérica*. Madrid, Spain: Instituto Geológico y Minero  
1277 de España, Cuadernos del Museo Geominero, 27, pp. 289–299.
- 1278 Pérez-Cano J, Bover-Arnal T, Martín-Closas C. 2020. Barremian charophytes from  
1279 the Maestrat Basin. *Cretaceous Research* **115**:104544. DOI:  
1280 <https://doi.org/10.1016/j.cretres.2020.104544>
- 1281 Pérez-de la Fuente R, Delclòs X, Peñalver E, Arillo A. 2011. Biting midges (Diptera:  
1282 Ceratopogonidae) from the Early Cretaceous El Soplao amber (N Spain).  
1283 *Cretaceous Research* **32**:750–761. DOI:  
1284 <https://doi.org/10.1016/j.cretres.2011.05.003>
- 1285 Pérez-García A, Espílez E, Mampel L, Alcalá L. 2015. A new European Albian turtle  
1286 that extends the known stratigraphic range of the Pleurosternidae

- 1287 (Paracryptodira). *Cretaceous Research* **55**:74–83. DOI:  
1288 <https://doi.org/10.1016/j.cretres.2015.02.007>
- 1289 Pérez-García A, Espílez E, Mampel L, Alcalá L. 2020. A new basal turtle represented  
1290 by the two most complete skeletons of Helochelydridae in Europe. *Cretaceous*  
1291 *Research* **107**:104291. DOI: <https://doi.org/10.1016/j.cretres.2019.104291>
- 1292 Peris D. 2020. Coleoptera in amber from Cretaceous resiniferous forests. *Cretaceous*  
1293 *Research* **113**:104484. DOI: <https://doi.org/10.1016/j.cretres.2020.104484>
- 1294 Peris D, Labandeira CC, Barrón E, Delclòs X, Rust J, Wang B. 2020. Generalist  
1295 pollen-feeding beetles during the mid-Cretaceous. *iScience* **23**:100913. DOI:  
1296 <https://doi.org/10.1016/j.isci.2020.100913>
- 1297 Perrichot V, Néraudeau D, Nel A, De Ploeg G. 2007. A reassessment of the  
1298 Cretaceous amber deposits from France and their palaeontological  
1299 significance. *African Invertebrates* **48**:213–227.
- 1300 Perrichot V, Néraudeau D, Tafforeau P. 2010. Charentese amber. In: Penney D (Ed),  
1301 *Biodiversity of Fossils in Amber from the Major World Deposits*. Rochdale, UK: Siri  
1302 Scientific Press, pp. 193–208.
- 1303 Peyrot D, Rodríguez-López JP, Barrón E, Meléndez N. 2007. Palynology and  
1304 biostratigraphy of the Escucha Formation in the Early Cretaceous Oliete Sub-  
1305 basin, Teruel, Spain. *Revista Española de Micropaleontología* **39**:135–154.
- 1306 Poinar G, Lambert JB, Wu Y. 2007. Araucarian source of fossiliferous Burmese  
1307 amber: spectroscopic and anatomical evidence. *Journal of the Botanical Research*  
1308 *Institute of Texas* **1**:449–455.
- 1309 Rasnitsyn AP, Quicke DL. 2002. *History of insects*. Amsterdam, Netherlands: Kluwer  
1310 Academic Publishers.

- 1311 Rodríguez-López JP, Meléndez N, Soria AR, De Boer PL. 2009. Reinterpretación  
1312 estratigráfica y sedimentológica de las formaciones Escucha y Utrillas de la  
1313 Cordillera Ibérica. *Revista de la Sociedad Geológica de España* **22**:163–219.
- 1314 Riveline J, Berger J-P, Feist M, Martín-Closas C, Schudack M, Soulié-Märsche I.  
1315 1996. European Mesozoic-Cenozoic charophyte biozonation. *Bulletin de la*  
1316 *Société Géologique de France* **167**:453–468.
- 1317 Rogers RR, Eberth DA, Fiorillo AR. 2007. *Bonebeds. Genesis, Analysis and*  
1318 *Paleobiological Significance*. Chicago, USA: The University of Chicago Press.
- 1319 Salas R, Guimerà J. 1996. Rasgos estructurales principales de la cuenca cretácica  
1320 inferior del Maestrazgo (Cordillera Ibérica oriental). *Geogaceta* **20**:1704–1706.
- 1321 Sames B. 2011. Early Cretaceous *Theriosynoecum* Branson 1936 in North America  
1322 and Europe. *Micropaleontology* **57**:291–344.
- 1323 Schmidt AR, Jancke S, Lindquist EE, Ragazzi E, Roghi G, Nascimbene PC, Schmidt  
1324 K, Wappler T, Grimaldi D. 2012. Arthropods in amber from the Triassic Period.  
1325 *Proceedings of the National Academy of Science of the United States of America*  
1326 **109**:14796–14801. DOI: <https://doi.org/10.1073/pnas.1208464109>
- 1327 Seyfullah LJ, Beimforde C, Dal Corso J, Perrichot V, Rikkinen J, Schmidt AR. 2018.  
1328 Production and preservation of resins – past and present. *Biological Reviews*  
1329 **93**:1684–1714. DOI: <https://doi.org/10.1111/brv.12414>
- 1330 Seyfullah LJ, Roberts EA, Schmidt AR, Ragazzi E, Anderson KB, Rodrigues do  
1331 Nascimento Jr D, Ferreira da Silva Filho W, Kunzmann L. 2020. Revealing the  
1332 diversity of amber source plants from the Early Cretaceous Crato Formation,  
1333 Brazil. *BMC Evolutionary Biology* **20**:107. DOI: [https://doi.org/10.1186/s12862-020-](https://doi.org/10.1186/s12862-020-01651-2)  
1334 [01651-2](https://doi.org/10.1186/s12862-020-01651-2)

- 1335 Speranza M, Ascaso C, Delclòs X, Peñalver E. 2015. Cretaceous mycelia preserving  
1336 fungal polysaccharides: Taphonomic and paleoecological potential of  
1337 microorganisms preserved in fossil resins. *Geologica Acta* **13**:363–385. DOI:  
1338 <https://doi.org/10.1344/GeologicaActa2015.13.4.8>
- 1339 Strachan MG, Alexander R, Kagi RI. 1988. Trimethylnaphthalenes in crude oils and  
1340 sediments: Effects of source and maturity. *Geochimica et Cosmochimica Acta*  
1341 **52**:1255–1264. DOI: [https://doi.org/10.1016/0016-7037\(88\)90279-7](https://doi.org/10.1016/0016-7037(88)90279-7)
- 1342 Stuchlik L, Ziemińska-Tworzydło M, Kohlman-Adamska A, Grabowska I, Ważyńska  
1343 H, Sadowska A. 2002. *Atlas of Pollen and Spores of the Polish Neogene Vol. 2,*  
1344 *Gymnosperms*. Warsaw, Poland: Polish Academy of Sciences.
- 1345 Tanke DH. 2004. Mosquitoes and mud: The 2003 Royal Tyrrell Museum of  
1346 Palaeontology expedition to the Grande Prairie region (Northwestern Alberta,  
1347 Canada). *Alberta Paleontological Society Bulletin* **19**:3–31.
- 1348 Tanrikulu S, Doyle JA, Delusina I. 2018. Early Cretaceous (Albian) spores and pollen  
1349 from the Glen Rose Formation of Texas and their significance for correlation of the  
1350 Potomac Group. *Palynology* **42**:438–456. DOI:  
1351 <https://doi.org/10.1080/01916122.2017.1374309>
- 1352 Taylor TN, Alvin KL. 1984. Ultrastructure and development of Mesozoic pollen:  
1353 *Classopollis*. *American Journal of Botany* **71**:575–587.
- 1354 Taylor DW, Hu S. 2010. Coevolution of early angiosperms and their pollinators:  
1355 Evidence for pollen. *Palaeontographica Abteilung B* **283**:103–135. DOI:  
1356 <https://doi.org/10.1127/palb/283/2010/103>
- 1357 Tibert NE, Colin JP, Kirkland JI, Alcalá L, Martín-Closas C. 2013. Lower Cretaceous  
1358 nonmarine ostracodes from an Escucha Formation dinosaur bonebed in eastern  
1359 Spain. *Micropaleontology* **59**:83–91.

- 1360 Tihelka E, Huang D, Perrichot V, Cai C. 2021. A previously missing link in the  
1361 evolution of dasytine soft-winged flower beetles from Cretaceous Charentese  
1362 amber (Coleoptera, Melyridae). *Papers in Palaeontology*, 12 pp. DOI:  
1363 <https://doi.org/10.1002/spp2.1360>
- 1364 Trabelsi K, Sames B, Nasri A, Piovesan EK, Elferhi F, Skanji A, Houla Y, Soussi M,  
1365 Wagreich M. 2021. Ostracods as proxies for marginal marine to non-marine  
1366 intervals in the mid-Cretaceous carbonate platform of the Central Tunisian Atlas  
1367 (North Africa): Response to major short-term sea-level falls. *Cretaceous Research*  
1368 **117**:104581. DOI: <https://doi.org/10.1016/j.cretres.2020.104581>
- 1369 Traverse A. 2007. *Paleopalynology*. Dordrecht, Netherlands: Springer, 2<sup>nd</sup> Edition.
- 1370 Vajda V, Pesquero Fernández MD, Villanueva-Amadoz U, Lehsten V, Alcalá L. 2016.  
1371 Dietary and environmental implications of Early Cretaceous predatory dinosaur  
1372 coprolites from Teruel, Spain. *Palaeogeography, Palaeoclimatology,*  
1373 *Palaeoecology* **464**:134–142. DOI: <https://doi.org/10.1016/j.palaeo.2016.02.036>
- 1374 Van Konijnenburg-Van Cittert JHA. 2002. Ecology of some Late Triassic to Early  
1375 Cretaceous ferns in Eurasia. *Review of Palaeobotany and Palynology* **119**:113–  
1376 124. DOI: [https://doi.org/10.1016/S0034-6667\(01\)00132-4](https://doi.org/10.1016/S0034-6667(01)00132-4)
- 1377 Vance TC. 1974. Larvae of the Sericothripini (Thysanoptera: Thripidae), with  
1378 reference to other larvae of the Terebrantia, of Illinois. *Illinois Natural History*  
1379 *Survey Bulletin* **31**:144–208.
- 1380 Villanueva-Amadoz U, Sender LM, Alcalá L, Pons D, Royo-Torres R, Diez JB. 2015.  
1381 Paleoenvironmental reconstruction of an Albian plant community from the Ariño  
1382 bonebed layer (Iberian Chain, NE Spain). *Historical Biology* **27**:430–441. DOI:  
1383 <https://doi.org/10.1080/08912963.2014.895826>



- 1384 Zheng D, Chang S-C, Perrichot V, Dutta S, Rudra A, Mu L, Kelly RS, Zhang Qi,  
1385 Zhang Qin, Wong J, Wang J, Wang H, Fang Y, Zhang H, Wang B. 2018. A Late  
1386 Cretaceous amber biota from central Myanmar. *Nature Communications* **9**:3170.  
1387 DOI: <https://doi.org/10.1038/s41467-018-05650-2>
